# Supplementary material for: The Effects of a 10-Week Home-Based Exercise Programme in Individuals with Parkinson’s Disease during the COVID-19 Pandemic: A Pilot Study
Source: MDPI journal article supplement (doi:10.3390/app11104518), 2021-05-15
Supplement: s1 [file s1]

# สมุดบันทึกการออกกำลังกายที่บ้าน

เพื่อพัฒนาการเดินและการหมุนตัวในผู้ป่วยโรคพาร์กินสัน

โดย อาจารย์เฟื่องฟ้า ขอบคุณ

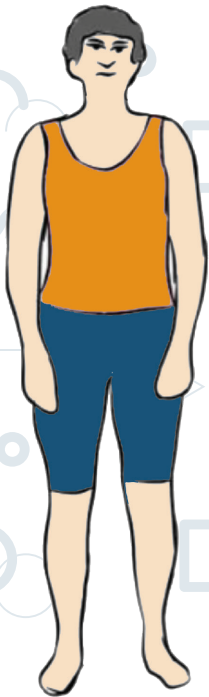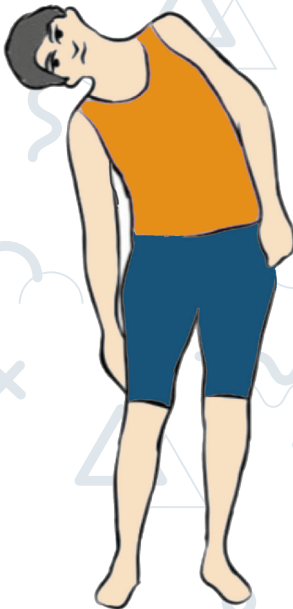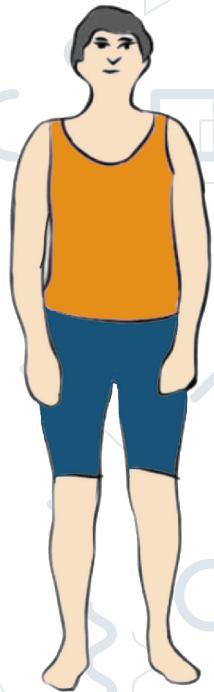



# การยืดกล้ามเนื้อก่อนออกกำลังกายตามโปรแกรม

## “ท่านต้องยืดก่อนเริ่มโปรแกรมทุกครั้ง”

### ท่าที่ 1 : ยืดกล้ามเนื้อต้นขาด้านหลัง

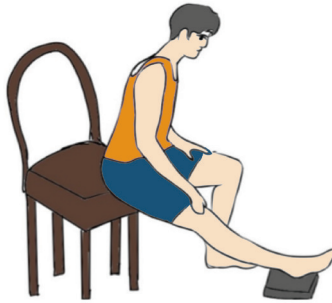

**ท่าเริ่ม:** นั่งบนเก้าอี้หรือเตียงเตี้ย เขยียดขาขวาตรง ส้นเท้าวางบนพื้น

**ท่ายืด:** ยืดลำตัวตรง และพยายามเขยียดขาขวาให้ตรง จากนั้นค่อย ๆ โน้มตัวไปข้างหน้าในขณะที่ลำตัวยืดตรง ท่านจะรู้สึกว่าการยืดกล้ามเนื้อต้นขาด้านหลังถูกยืด ทำค้างไว้ ประมาณ 30 วินาที จากนั้นพัก ทำ 3 ครั้ง และเปลี่ยนไปทำที่ขาข้างซ้ายอีก 3 ครั้ง

#### บันทึกการฝึกออกกำลังกาย

|                                               |                                    |                                               |                                    |                                    |                                               |                                    |
|-----------------------------------------------|------------------------------------|-----------------------------------------------|------------------------------------|------------------------------------|-----------------------------------------------|------------------------------------|
| <input type="checkbox"/> วันที่ 1             | <input type="checkbox"/> วันที่ 2  | <input type="checkbox"/> วันที่ 3             | <input type="checkbox"/> วันที่ 4  | <input type="checkbox"/> วันที่ 5  | <input type="checkbox"/> วันที่ 6             | <input type="checkbox"/> วันที่ 7  |
| <input checked="" type="checkbox"/> วันที่ 8  | <input type="checkbox"/> วันที่ 9  | <input checked="" type="checkbox"/> วันที่ 10 | <input type="checkbox"/> วันที่ 11 | <input type="checkbox"/> วันที่ 12 | <input checked="" type="checkbox"/> วันที่ 13 | <input type="checkbox"/> วันที่ 14 |
| <input type="checkbox"/> วันที่ 15            | <input type="checkbox"/> วันที่ 16 | <input checked="" type="checkbox"/> วันที่ 17 | <input type="checkbox"/> วันที่ 18 | <input type="checkbox"/> วันที่ 19 | <input checked="" type="checkbox"/> วันที่ 20 | <input type="checkbox"/> วันที่ 21 |
| <input type="checkbox"/> วันที่ 22            | <input type="checkbox"/> วันที่ 23 | <input type="checkbox"/> วันที่ 24            | <input type="checkbox"/> วันที่ 25 | <input type="checkbox"/> วันที่ 26 | <input type="checkbox"/> วันที่ 27            | <input type="checkbox"/> วันที่ 28 |
| <input type="checkbox"/> วันที่ 29            | <input type="checkbox"/> วันที่ 30 | <input checked="" type="checkbox"/> วันที่ 31 | <input type="checkbox"/> วันที่ 32 | <input type="checkbox"/> วันที่ 33 | <input checked="" type="checkbox"/> วันที่ 34 | <input type="checkbox"/> วันที่ 35 |
| <input type="checkbox"/> วันที่ 36            | <input type="checkbox"/> วันที่ 37 | <input type="checkbox"/> วันที่ 38            | <input type="checkbox"/> วันที่ 39 | <input type="checkbox"/> วันที่ 40 | <input type="checkbox"/> วันที่ 41            | <input type="checkbox"/> วันที่ 42 |
| <input type="checkbox"/> วันที่ 43            | <input type="checkbox"/> วันที่ 44 | <input checked="" type="checkbox"/> วันที่ 45 | <input type="checkbox"/> วันที่ 46 | <input type="checkbox"/> วันที่ 47 | <input checked="" type="checkbox"/> วันที่ 48 | <input type="checkbox"/> วันที่ 49 |
| <input type="checkbox"/> วันที่ 50            | <input type="checkbox"/> วันที่ 51 | <input type="checkbox"/> วันที่ 52            | <input type="checkbox"/> วันที่ 53 | <input type="checkbox"/> วันที่ 54 | <input type="checkbox"/> วันที่ 55            | <input type="checkbox"/> วันที่ 56 |
| <input checked="" type="checkbox"/> วันที่ 57 | <input type="checkbox"/> วันที่ 58 | <input checked="" type="checkbox"/> วันที่ 59 | <input type="checkbox"/> วันที่ 60 | <input type="checkbox"/> วันที่ 61 | <input checked="" type="checkbox"/> วันที่ 62 | <input type="checkbox"/> วันที่ 63 |
| <input type="checkbox"/> วันที่ 64            | <input type="checkbox"/> วันที่ 65 | <input checked="" type="checkbox"/> วันที่ 66 | <input type="checkbox"/> วันที่ 67 | <input type="checkbox"/> วันที่ 68 | <input checked="" type="checkbox"/> วันที่ 69 | <input type="checkbox"/> วันที่ 70 |
| <input checked="" type="checkbox"/> วันที่ 71 | <input type="checkbox"/> วันที่ 72 | <input checked="" type="checkbox"/> วันที่ 73 | <input type="checkbox"/> วันที่ 74 | <input type="checkbox"/> วันที่ 75 |                                               |                                    |

## ท่าที่ 2 : ยึดกล้ามเนื้อน่องด้านหลัง

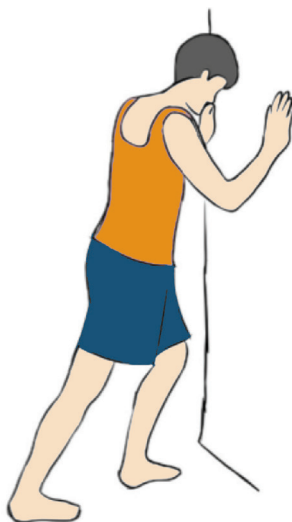

**ท่าเริ่ม:** ยืนหลังตรง ก้าวขาซ้ายไปข้างหน้า 1 ก้าว มือแตะกำแพง

**ท่ายึด:** ค่อย ๆ ไน้มตัวไปข้างหน้า ในขณะที่หลังตรง และส้นเท้าขวาสัมผัสพื้น จนรู้สึกว่าร่องด้านหลังน่องขวาถูกยืด ทำค้างไว้ครั้งละ 20-30 วินาที จนครบ 3 ครั้ง แล้วเปลี่ยนเป็นข้างซ้าย

### บันทึกการฝึกออกกำลังกาย

|                                    |                                    |                                               |                                    |                                               |                                               |                                    |
|------------------------------------|------------------------------------|-----------------------------------------------|------------------------------------|-----------------------------------------------|-----------------------------------------------|------------------------------------|
| <input type="checkbox"/> วันที่ 1  | <input type="checkbox"/> วันที่ 2  | <input checked="" type="checkbox"/> วันที่ 3  | <input type="checkbox"/> วันที่ 4  | <input checked="" type="checkbox"/> วันที่ 5  | <input checked="" type="checkbox"/> วันที่ 6  | <input type="checkbox"/> วันที่ 7  |
| <input type="checkbox"/> วันที่ 8  | <input type="checkbox"/> วันที่ 9  | <input type="checkbox"/> วันที่ 10            | <input type="checkbox"/> วันที่ 11 | <input type="checkbox"/> วันที่ 12            | <input type="checkbox"/> วันที่ 13            | <input type="checkbox"/> วันที่ 14 |
| <input type="checkbox"/> วันที่ 15 | <input type="checkbox"/> วันที่ 16 | <input checked="" type="checkbox"/> วันที่ 17 | <input type="checkbox"/> วันที่ 18 | <input checked="" type="checkbox"/> วันที่ 19 | <input checked="" type="checkbox"/> วันที่ 20 | <input type="checkbox"/> วันที่ 21 |
| <input type="checkbox"/> วันที่ 22 | <input type="checkbox"/> วันที่ 23 | <input type="checkbox"/> วันที่ 24            | <input type="checkbox"/> วันที่ 25 | <input type="checkbox"/> วันที่ 26            | <input type="checkbox"/> วันที่ 27            | <input type="checkbox"/> วันที่ 28 |
| <input type="checkbox"/> วันที่ 29 | <input type="checkbox"/> วันที่ 30 | <input checked="" type="checkbox"/> วันที่ 31 | <input type="checkbox"/> วันที่ 32 | <input checked="" type="checkbox"/> วันที่ 33 | <input checked="" type="checkbox"/> วันที่ 34 | <input type="checkbox"/> วันที่ 35 |
| <input type="checkbox"/> วันที่ 36 | <input type="checkbox"/> วันที่ 37 | <input type="checkbox"/> วันที่ 38            | <input type="checkbox"/> วันที่ 39 | <input type="checkbox"/> วันที่ 40            | <input type="checkbox"/> วันที่ 41            | <input type="checkbox"/> วันที่ 42 |
| <input type="checkbox"/> วันที่ 43 | <input type="checkbox"/> วันที่ 44 | <input checked="" type="checkbox"/> วันที่ 45 | <input type="checkbox"/> วันที่ 46 | <input checked="" type="checkbox"/> วันที่ 47 | <input checked="" type="checkbox"/> วันที่ 48 | <input type="checkbox"/> วันที่ 49 |
| <input type="checkbox"/> วันที่ 50 | <input type="checkbox"/> วันที่ 51 | <input checked="" type="checkbox"/> วันที่ 52 | <input type="checkbox"/> วันที่ 53 | <input checked="" type="checkbox"/> วันที่ 54 | <input checked="" type="checkbox"/> วันที่ 55 | <input type="checkbox"/> วันที่ 56 |
| <input type="checkbox"/> วันที่ 57 | <input type="checkbox"/> วันที่ 58 | <input checked="" type="checkbox"/> วันที่ 59 | <input type="checkbox"/> วันที่ 60 | <input type="checkbox"/> วันที่ 61            | <input checked="" type="checkbox"/> วันที่ 62 | <input type="checkbox"/> วันที่ 63 |
| <input type="checkbox"/> วันที่ 64 | <input type="checkbox"/> วันที่ 65 | <input checked="" type="checkbox"/> วันที่ 66 | <input type="checkbox"/> วันที่ 67 | <input checked="" type="checkbox"/> วันที่ 68 | <input checked="" type="checkbox"/> วันที่ 69 | <input type="checkbox"/> วันที่ 70 |
| <input type="checkbox"/> วันที่ 71 | <input type="checkbox"/> วันที่ 72 | <input type="checkbox"/> วันที่ 73            | <input type="checkbox"/> วันที่ 74 | <input type="checkbox"/> วันที่ 75            |                                               |                                    |

### ท่าที่ 3 : ยึดกล้ามเนื้อคอ

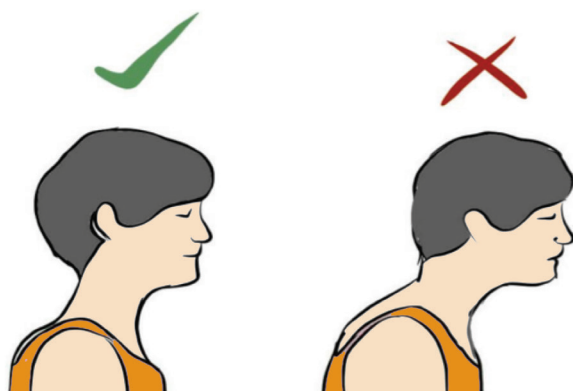

#### ท่าที่ 3ก

**ท่าเริ่ม:** นิ่งบนเก้าอี้ ตัวตรง หลังตรง และเท้าวางราบบนพื้น ส่องกระจก หรือญาติคอยแนะนำให้ผู้ป่วย ปรับตำแหน่งของหูให้อยู่ในแนวเดียวกับไหล่ ตามองตรง หน้าไม่ก้มหรือเงย

#### บันทึกการฝึกออกกำลังกาย

|                                               |                                    |                                               |                                    |                                               |                                               |                                    |
|-----------------------------------------------|------------------------------------|-----------------------------------------------|------------------------------------|-----------------------------------------------|-----------------------------------------------|------------------------------------|
| <input type="checkbox"/> วันที่ 1             | <input type="checkbox"/> วันที่ 2  | <input checked="" type="checkbox"/> วันที่ 3  | <input type="checkbox"/> วันที่ 4  | <input checked="" type="checkbox"/> วันที่ 5  | <input checked="" type="checkbox"/> วันที่ 6  | <input type="checkbox"/> วันที่ 7  |
| <input type="checkbox"/> วันที่ 8             | <input type="checkbox"/> วันที่ 9  | <input type="checkbox"/> วันที่ 10            | <input type="checkbox"/> วันที่ 11 | <input type="checkbox"/> วันที่ 12            | <input type="checkbox"/> วันที่ 13            | <input type="checkbox"/> วันที่ 14 |
| <input type="checkbox"/> วันที่ 15            | <input type="checkbox"/> วันที่ 16 | <input checked="" type="checkbox"/> วันที่ 17 | <input type="checkbox"/> วันที่ 18 | <input checked="" type="checkbox"/> วันที่ 19 | <input checked="" type="checkbox"/> วันที่ 20 | <input type="checkbox"/> วันที่ 21 |
| <input type="checkbox"/> วันที่ 22            | <input type="checkbox"/> วันที่ 23 | <input type="checkbox"/> วันที่ 24            | <input type="checkbox"/> วันที่ 25 | <input type="checkbox"/> วันที่ 26            | <input type="checkbox"/> วันที่ 27            | <input type="checkbox"/> วันที่ 28 |
| <input checked="" type="checkbox"/> วันที่ 29 | <input type="checkbox"/> วันที่ 30 | <input checked="" type="checkbox"/> วันที่ 31 | <input type="checkbox"/> วันที่ 32 | <input checked="" type="checkbox"/> วันที่ 33 | <input checked="" type="checkbox"/> วันที่ 34 | <input type="checkbox"/> วันที่ 35 |
| <input type="checkbox"/> วันที่ 36            | <input type="checkbox"/> วันที่ 37 | <input type="checkbox"/> วันที่ 38            | <input type="checkbox"/> วันที่ 39 | <input type="checkbox"/> วันที่ 40            | <input type="checkbox"/> วันที่ 41            | <input type="checkbox"/> วันที่ 42 |
| <input type="checkbox"/> วันที่ 43            | <input type="checkbox"/> วันที่ 44 | <input checked="" type="checkbox"/> วันที่ 45 | <input type="checkbox"/> วันที่ 46 | <input checked="" type="checkbox"/> วันที่ 47 | <input checked="" type="checkbox"/> วันที่ 48 | <input type="checkbox"/> วันที่ 49 |
| <input type="checkbox"/> วันที่ 50            | <input type="checkbox"/> วันที่ 51 | <input checked="" type="checkbox"/> วันที่ 52 | <input type="checkbox"/> วันที่ 53 | <input checked="" type="checkbox"/> วันที่ 54 | <input checked="" type="checkbox"/> วันที่ 55 | <input type="checkbox"/> วันที่ 56 |
| <input type="checkbox"/> วันที่ 57            | <input type="checkbox"/> วันที่ 58 | <input checked="" type="checkbox"/> วันที่ 59 | <input type="checkbox"/> วันที่ 60 | <input type="checkbox"/> วันที่ 61            | <input checked="" type="checkbox"/> วันที่ 62 | <input type="checkbox"/> วันที่ 63 |
| <input type="checkbox"/> วันที่ 64            | <input type="checkbox"/> วันที่ 65 | <input checked="" type="checkbox"/> วันที่ 66 | <input type="checkbox"/> วันที่ 67 | <input checked="" type="checkbox"/> วันที่ 68 | <input checked="" type="checkbox"/> วันที่ 69 | <input type="checkbox"/> วันที่ 70 |
| <input type="checkbox"/> วันที่ 71            | <input type="checkbox"/> วันที่ 72 | <input type="checkbox"/> วันที่ 73            | <input type="checkbox"/> วันที่ 74 | <input type="checkbox"/> วันที่ 75            |                                               |                                    |

### ท่าที่ 3 : ยึดกล้ามเนื้อคอ

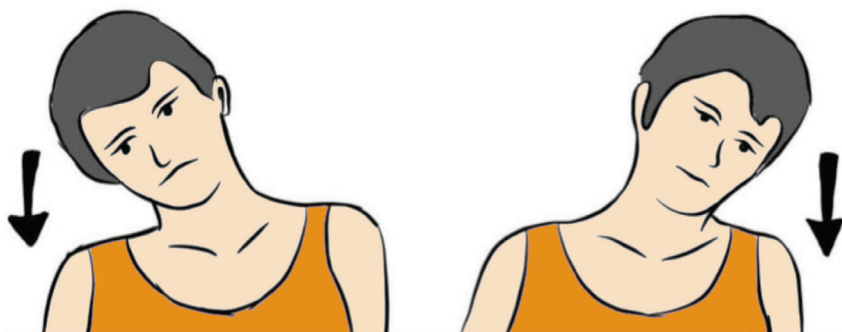

#### ท่าที่ 3v

**ท่าเอียงคอ:** นิ่งบนเก้าอี้ ตัวตรง หลังตรง และเท้าวางราบบนพื้น ศีรษะอยู่ในแนวตรงแล้ว ให้ท่านค่อยๆ เอียงคอไปทางขวาช้าๆ โดยให้หูข้างขวาไปชิดไหล่ขวามากที่สุด จากนั้นเอียงคอกลับมาตำแหน่งเดิม และเปลี่ยนไปทำข้างซ้าย ทำ 3 รอบ

#### บันทึกการฝึกออกกำลังกาย

|                                    |                                    |                                               |                                    |                                               |                                               |                                    |
|------------------------------------|------------------------------------|-----------------------------------------------|------------------------------------|-----------------------------------------------|-----------------------------------------------|------------------------------------|
| <input type="checkbox"/> วันที่ 1  | <input type="checkbox"/> วันที่ 2  | <input checked="" type="checkbox"/> วันที่ 3  | <input type="checkbox"/> วันที่ 4  | <input checked="" type="checkbox"/> วันที่ 5  | <input checked="" type="checkbox"/> วันที่ 6  | <input type="checkbox"/> วันที่ 7  |
| <input type="checkbox"/> วันที่ 8  | <input type="checkbox"/> วันที่ 9  | <input type="checkbox"/> วันที่ 10            | <input type="checkbox"/> วันที่ 11 | <input type="checkbox"/> วันที่ 12            | <input type="checkbox"/> วันที่ 13            | <input type="checkbox"/> วันที่ 14 |
| <input type="checkbox"/> วันที่ 15 | <input type="checkbox"/> วันที่ 16 | <input checked="" type="checkbox"/> วันที่ 17 | <input type="checkbox"/> วันที่ 18 | <input checked="" type="checkbox"/> วันที่ 19 | <input checked="" type="checkbox"/> วันที่ 20 | <input type="checkbox"/> วันที่ 21 |
| <input type="checkbox"/> วันที่ 22 | <input type="checkbox"/> วันที่ 23 | <input type="checkbox"/> วันที่ 24            | <input type="checkbox"/> วันที่ 25 | <input type="checkbox"/> วันที่ 26            | <input type="checkbox"/> วันที่ 27            | <input type="checkbox"/> วันที่ 28 |
| <input type="checkbox"/> วันที่ 29 | <input type="checkbox"/> วันที่ 30 | <input checked="" type="checkbox"/> วันที่ 31 | <input type="checkbox"/> วันที่ 32 | <input checked="" type="checkbox"/> วันที่ 33 | <input checked="" type="checkbox"/> วันที่ 34 | <input type="checkbox"/> วันที่ 35 |
| <input type="checkbox"/> วันที่ 36 | <input type="checkbox"/> วันที่ 37 | <input checked="" type="checkbox"/> วันที่ 38 | <input type="checkbox"/> วันที่ 39 | <input checked="" type="checkbox"/> วันที่ 40 | <input type="checkbox"/> วันที่ 41            | <input type="checkbox"/> วันที่ 42 |
| <input type="checkbox"/> วันที่ 43 | <input type="checkbox"/> วันที่ 44 | <input checked="" type="checkbox"/> วันที่ 45 | <input type="checkbox"/> วันที่ 46 | <input type="checkbox"/> วันที่ 47            | <input checked="" type="checkbox"/> วันที่ 48 | <input type="checkbox"/> วันที่ 49 |
| <input type="checkbox"/> วันที่ 50 | <input type="checkbox"/> วันที่ 51 | <input checked="" type="checkbox"/> วันที่ 52 | <input type="checkbox"/> วันที่ 53 | <input checked="" type="checkbox"/> วันที่ 54 | <input checked="" type="checkbox"/> วันที่ 55 | <input type="checkbox"/> วันที่ 56 |
| <input type="checkbox"/> วันที่ 57 | <input type="checkbox"/> วันที่ 58 | <input type="checkbox"/> วันที่ 59            | <input type="checkbox"/> วันที่ 60 | <input type="checkbox"/> วันที่ 61            | <input type="checkbox"/> วันที่ 62            | <input type="checkbox"/> วันที่ 63 |
| <input type="checkbox"/> วันที่ 64 | <input type="checkbox"/> วันที่ 65 | <input checked="" type="checkbox"/> วันที่ 66 | <input type="checkbox"/> วันที่ 67 | <input checked="" type="checkbox"/> วันที่ 68 | <input checked="" type="checkbox"/> วันที่ 69 | <input type="checkbox"/> วันที่ 70 |
| <input type="checkbox"/> วันที่ 71 | <input type="checkbox"/> วันที่ 72 | <input type="checkbox"/> วันที่ 73            | <input type="checkbox"/> วันที่ 74 | <input type="checkbox"/> วันที่ 75            |                                               |                                    |

# การยืดกล้ามเนื้อก่อนออกกำลังกายตามโปรแกรม

หลังจากยืดกล้ามเนื้อแล้ว ท่านเข้าสู่การออกกำลังกาย โดยให้ท่านทำงานรู้สึกผ่อนคลายทุกท่า และหากท่านได้ทำแล้ว ให้ท่านทำเครื่องหมายถูกในตารางทุกวัน หากท่านรู้สึกเหนื่อยหรือรู้สึกผิดปกติใดๆให้ท่านหยุดพักจนกว่าจะดีขึ้น

## ท่าที่ 1 : การฝึกหายใจ

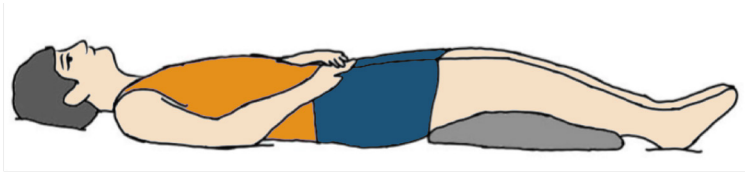

**ท่าเริ่ม:** นอนหงาย ใช้หมอนรองใต้ข้อเข่าได้หากต้องการ วางมือทั้งสองบริเวณหน้าท้อง

**ท่าออกกำลังกาย:** หายใจเข้าลึกๆทางจมูกให้ท้องป่องจนดันมือที่วางอยู่บนหน้าท้องขึ้นแล้วหายใจออกยาวๆ ช้าๆ ทางปาก จนท้องแฟบ มือที่วางอยู่จะเคลื่อนที่ลง ทำทั้งหมด 3 ครั้ง

### บันทึกการฝึกออกกำลังกาย

|                                               |                                    |                                               |                                    |                                    |                                               |                                    |
|-----------------------------------------------|------------------------------------|-----------------------------------------------|------------------------------------|------------------------------------|-----------------------------------------------|------------------------------------|
| <input type="checkbox"/> วันที่ 1             | <input type="checkbox"/> วันที่ 2  | <input checked="" type="checkbox"/> วันที่ 3  | <input type="checkbox"/> วันที่ 4  | <input type="checkbox"/> วันที่ 5  | <input checked="" type="checkbox"/> วันที่ 6  | <input type="checkbox"/> วันที่ 7  |
| <input type="checkbox"/> วันที่ 8             | <input type="checkbox"/> วันที่ 9  | <input type="checkbox"/> วันที่ 10            | <input type="checkbox"/> วันที่ 11 | <input type="checkbox"/> วันที่ 12 | <input type="checkbox"/> วันที่ 13            | <input type="checkbox"/> วันที่ 14 |
| <input type="checkbox"/> วันที่ 15            | <input type="checkbox"/> วันที่ 16 | <input checked="" type="checkbox"/> วันที่ 17 | <input type="checkbox"/> วันที่ 18 | <input type="checkbox"/> วันที่ 19 | <input checked="" type="checkbox"/> วันที่ 20 | <input type="checkbox"/> วันที่ 21 |
| <input type="checkbox"/> วันที่ 22            | <input type="checkbox"/> วันที่ 23 | <input type="checkbox"/> วันที่ 24            | <input type="checkbox"/> วันที่ 25 | <input type="checkbox"/> วันที่ 26 | <input type="checkbox"/> วันที่ 27            | <input type="checkbox"/> วันที่ 28 |
| <input checked="" type="checkbox"/> วันที่ 29 | <input type="checkbox"/> วันที่ 30 | <input checked="" type="checkbox"/> วันที่ 31 | <input type="checkbox"/> วันที่ 32 | <input type="checkbox"/> วันที่ 33 | <input checked="" type="checkbox"/> วันที่ 34 | <input type="checkbox"/> วันที่ 35 |
| <input type="checkbox"/> วันที่ 36            | <input type="checkbox"/> วันที่ 37 | <input checked="" type="checkbox"/> วันที่ 38 | <input type="checkbox"/> วันที่ 39 | <input type="checkbox"/> วันที่ 40 | <input checked="" type="checkbox"/> วันที่ 41 | <input type="checkbox"/> วันที่ 42 |
| <input type="checkbox"/> วันที่ 43            | <input type="checkbox"/> วันที่ 44 | <input checked="" type="checkbox"/> วันที่ 45 | <input type="checkbox"/> วันที่ 46 | <input type="checkbox"/> วันที่ 47 | <input checked="" type="checkbox"/> วันที่ 48 | <input type="checkbox"/> วันที่ 49 |
| <input type="checkbox"/> วันที่ 50            | <input type="checkbox"/> วันที่ 51 | <input checked="" type="checkbox"/> วันที่ 52 | <input type="checkbox"/> วันที่ 53 | <input type="checkbox"/> วันที่ 54 | <input checked="" type="checkbox"/> วันที่ 55 | <input type="checkbox"/> วันที่ 56 |
| <input type="checkbox"/> วันที่ 57            | <input type="checkbox"/> วันที่ 58 | <input type="checkbox"/> วันที่ 59            | <input type="checkbox"/> วันที่ 60 | <input type="checkbox"/> วันที่ 61 | <input type="checkbox"/> วันที่ 62            | <input type="checkbox"/> วันที่ 63 |
| <input type="checkbox"/> วันที่ 64            | <input type="checkbox"/> วันที่ 65 | <input checked="" type="checkbox"/> วันที่ 66 | <input type="checkbox"/> วันที่ 67 | <input type="checkbox"/> วันที่ 68 | <input checked="" type="checkbox"/> วันที่ 69 | <input type="checkbox"/> วันที่ 70 |
| <input type="checkbox"/> วันที่ 71            | <input type="checkbox"/> วันที่ 72 | <input type="checkbox"/> วันที่ 73            | <input type="checkbox"/> วันที่ 74 | <input type="checkbox"/> วันที่ 75 |                                               |                                    |

## ท่าที่ 2 : ฝึกหมุนกลัมนื้อลำตัวส่วนล่าง

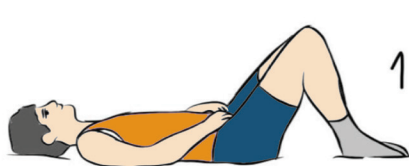

1

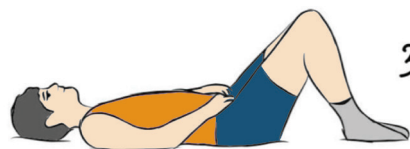

3

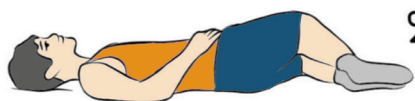

2

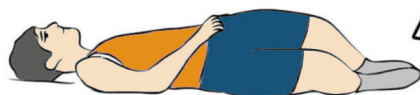

4

**ท่าเริ่ม:** นอนหงายราบกับพื้น ชันเข่าขึ้น

**ท่าออกกำลังกาย:** จากนั้นให้บิดหมุนขาทั้งสองข้างไปทางขวาซ้าย ให้มากที่สุดเท่าที่ทำได้แต่ต้องไม่ฝืนจนเกินไป จากนั้นค่อยๆ หมุนกลับ และหมุนไปทางซ้ายขวาๆ เท่าที่ทำได้ (ท่านสามารถหมุนตามจังหวะเมโทรโนมตามที่นักกายภาพบำบัดแนะนำได้) หายใจเข้า-ออกลึกๆ ทำจนรู้สึกผ่อนคลาย

### บันทึกการฝึกออกกำลังกาย

|                                    |                                    |                                               |                                    |                                               |                                               |                                    |
|------------------------------------|------------------------------------|-----------------------------------------------|------------------------------------|-----------------------------------------------|-----------------------------------------------|------------------------------------|
| <input type="checkbox"/> วันที่ 1  | <input type="checkbox"/> วันที่ 2  | <input checked="" type="checkbox"/> วันที่ 3  | <input type="checkbox"/> วันที่ 4  | <input checked="" type="checkbox"/> วันที่ 5  | <input checked="" type="checkbox"/> วันที่ 6  | <input type="checkbox"/> วันที่ 7  |
| <input type="checkbox"/> วันที่ 8  | <input type="checkbox"/> วันที่ 9  | <input type="checkbox"/> วันที่ 10            | <input type="checkbox"/> วันที่ 11 | <input type="checkbox"/> วันที่ 12            | <input type="checkbox"/> วันที่ 13            | <input type="checkbox"/> วันที่ 14 |
| <input type="checkbox"/> วันที่ 15 | <input type="checkbox"/> วันที่ 16 | <input checked="" type="checkbox"/> วันที่ 17 | <input type="checkbox"/> วันที่ 18 | <input checked="" type="checkbox"/> วันที่ 19 | <input checked="" type="checkbox"/> วันที่ 20 | <input type="checkbox"/> วันที่ 21 |
| <input type="checkbox"/> วันที่ 22 | <input type="checkbox"/> วันที่ 23 | <input type="checkbox"/> วันที่ 24            | <input type="checkbox"/> วันที่ 25 | <input type="checkbox"/> วันที่ 26            | <input type="checkbox"/> วันที่ 27            | <input type="checkbox"/> วันที่ 28 |
| <input type="checkbox"/> วันที่ 29 | <input type="checkbox"/> วันที่ 30 | <input checked="" type="checkbox"/> วันที่ 31 | <input type="checkbox"/> วันที่ 32 | <input checked="" type="checkbox"/> วันที่ 33 | <input checked="" type="checkbox"/> วันที่ 34 | <input type="checkbox"/> วันที่ 35 |
| <input type="checkbox"/> วันที่ 36 | <input type="checkbox"/> วันที่ 37 | <input type="checkbox"/> วันที่ 38            | <input type="checkbox"/> วันที่ 39 | <input type="checkbox"/> วันที่ 40            | <input type="checkbox"/> วันที่ 41            | <input type="checkbox"/> วันที่ 42 |
| <input type="checkbox"/> วันที่ 43 | <input type="checkbox"/> วันที่ 44 | <input checked="" type="checkbox"/> วันที่ 45 | <input type="checkbox"/> วันที่ 46 | <input checked="" type="checkbox"/> วันที่ 47 | <input checked="" type="checkbox"/> วันที่ 48 | <input type="checkbox"/> วันที่ 49 |
| <input type="checkbox"/> วันที่ 50 | <input type="checkbox"/> วันที่ 51 | <input checked="" type="checkbox"/> วันที่ 52 | <input type="checkbox"/> วันที่ 53 | <input checked="" type="checkbox"/> วันที่ 54 | <input checked="" type="checkbox"/> วันที่ 55 | <input type="checkbox"/> วันที่ 56 |
| <input type="checkbox"/> วันที่ 57 | <input type="checkbox"/> วันที่ 58 | <input checked="" type="checkbox"/> วันที่ 59 | <input type="checkbox"/> วันที่ 60 | <input type="checkbox"/> วันที่ 61            | <input checked="" type="checkbox"/> วันที่ 62 | <input type="checkbox"/> วันที่ 63 |
| <input type="checkbox"/> วันที่ 64 | <input type="checkbox"/> วันที่ 65 | <input checked="" type="checkbox"/> วันที่ 66 | <input type="checkbox"/> วันที่ 67 | <input checked="" type="checkbox"/> วันที่ 68 | <input checked="" type="checkbox"/> วันที่ 69 | <input type="checkbox"/> วันที่ 70 |
| <input type="checkbox"/> วันที่ 71 | <input type="checkbox"/> วันที่ 72 | <input type="checkbox"/> วันที่ 73            | <input type="checkbox"/> วันที่ 74 | <input type="checkbox"/> วันที่ 75            |                                               |                                    |



## ท่าที่ 3 : ฝึกหมุนกล้ามเนื้อสะโพก

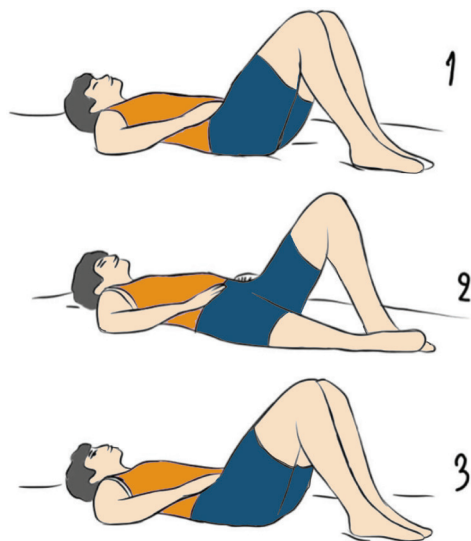

**ท่าเริ่ม:** นอนหงายราบกับพื้น ชันเข่าขึ้น

**ท่าออกกำลังกาย:** จากนั้นหมุนเบะขาขวาซ้ายๆ จนกระทั่งด้านข้างของเข่าแตะพื้น จากนั้นค่อยๆ หมุนกลับและทำซ้ำ 10 ครั้ง หรือจนรู้สึกผ่อนคลาย พัก หายใจเข้า-ออก ผ่อนคลายและเปลี่ยนเป็นขาซ้ายทำเช่นเดียวกัน (ท่านสามารถหมุนตามจังหวะเมโทรโนมตามัที่นักกายภาพบำบัดแนะนำได้)

### บันทึกการฝึกออกกำลังกาย

|                                    |                                    |                                               |                                    |                                               |                                               |                                    |
|------------------------------------|------------------------------------|-----------------------------------------------|------------------------------------|-----------------------------------------------|-----------------------------------------------|------------------------------------|
| <input type="checkbox"/> วันที่ 1  | <input type="checkbox"/> วันที่ 2  | <input checked="" type="checkbox"/> วันที่ 3  | <input type="checkbox"/> วันที่ 4  | <input checked="" type="checkbox"/> วันที่ 5  | <input checked="" type="checkbox"/> วันที่ 6  | <input type="checkbox"/> วันที่ 7  |
| <input type="checkbox"/> วันที่ 8  | <input type="checkbox"/> วันที่ 9  | <input type="checkbox"/> วันที่ 10            | <input type="checkbox"/> วันที่ 11 | <input type="checkbox"/> วันที่ 12            | <input type="checkbox"/> วันที่ 13            | <input type="checkbox"/> วันที่ 14 |
| <input type="checkbox"/> วันที่ 15 | <input type="checkbox"/> วันที่ 16 | <input checked="" type="checkbox"/> วันที่ 17 | <input type="checkbox"/> วันที่ 18 | <input checked="" type="checkbox"/> วันที่ 19 | <input checked="" type="checkbox"/> วันที่ 20 | <input type="checkbox"/> วันที่ 21 |
| <input type="checkbox"/> วันที่ 22 | <input type="checkbox"/> วันที่ 23 | <input type="checkbox"/> วันที่ 24            | <input type="checkbox"/> วันที่ 25 | <input type="checkbox"/> วันที่ 26            | <input type="checkbox"/> วันที่ 27            | <input type="checkbox"/> วันที่ 28 |
| <input type="checkbox"/> วันที่ 29 | <input type="checkbox"/> วันที่ 30 | <input checked="" type="checkbox"/> วันที่ 31 | <input type="checkbox"/> วันที่ 32 | <input checked="" type="checkbox"/> วันที่ 33 | <input checked="" type="checkbox"/> วันที่ 34 | <input type="checkbox"/> วันที่ 35 |
| <input type="checkbox"/> วันที่ 36 | <input type="checkbox"/> วันที่ 37 | <input type="checkbox"/> วันที่ 38            | <input type="checkbox"/> วันที่ 39 | <input type="checkbox"/> วันที่ 40            | <input type="checkbox"/> วันที่ 41            | <input type="checkbox"/> วันที่ 42 |
| <input type="checkbox"/> วันที่ 43 | <input type="checkbox"/> วันที่ 44 | <input checked="" type="checkbox"/> วันที่ 45 | <input type="checkbox"/> วันที่ 46 | <input checked="" type="checkbox"/> วันที่ 47 | <input checked="" type="checkbox"/> วันที่ 48 | <input type="checkbox"/> วันที่ 49 |
| <input type="checkbox"/> วันที่ 50 | <input type="checkbox"/> วันที่ 51 | <input checked="" type="checkbox"/> วันที่ 52 | <input type="checkbox"/> วันที่ 53 | <input checked="" type="checkbox"/> วันที่ 54 | <input checked="" type="checkbox"/> วันที่ 55 | <input type="checkbox"/> วันที่ 56 |
| <input type="checkbox"/> วันที่ 57 | <input type="checkbox"/> วันที่ 58 | <input checked="" type="checkbox"/> วันที่ 59 | <input type="checkbox"/> วันที่ 60 | <input type="checkbox"/> วันที่ 61            | <input checked="" type="checkbox"/> วันที่ 62 | <input type="checkbox"/> วันที่ 63 |
| <input type="checkbox"/> วันที่ 64 | <input type="checkbox"/> วันที่ 65 | <input checked="" type="checkbox"/> วันที่ 66 | <input type="checkbox"/> วันที่ 67 | <input checked="" type="checkbox"/> วันที่ 68 | <input checked="" type="checkbox"/> วันที่ 69 | <input type="checkbox"/> วันที่ 70 |
| <input type="checkbox"/> วันที่ 71 | <input type="checkbox"/> วันที่ 72 | <input type="checkbox"/> วันที่ 73            | <input type="checkbox"/> วันที่ 74 | <input type="checkbox"/> วันที่ 75            |                                               |                                    |

## ท่าที่ 4 : ฝึกหมุนแขน

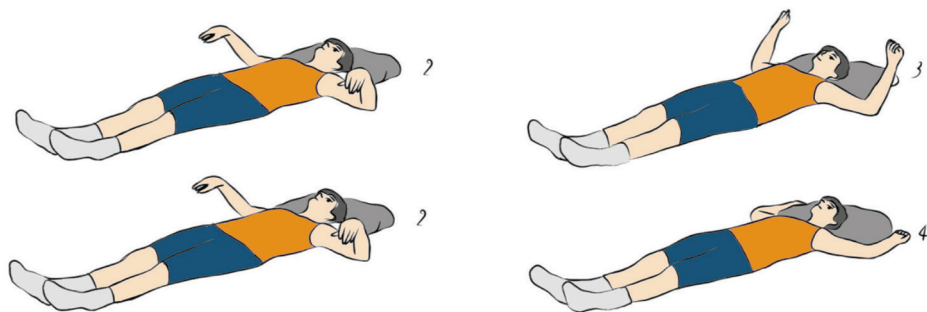

**ท่าเริ่ม:** นอนหงายราบกับพื้น ทางแขนออกทางด้านข้างและงอศอก 90 องศา คอวางตามรูป

**ท่าออกกำลังกาย:** ค่อยๆ บิดหมุนแขนทั้งสองข้างขึ้นไปทางศีรษะช้าๆ โดยแขน ก่อนแขน และมือไปพร้อมๆ กันจนติดพื้นเท่าที่ทำได้ พยายามไม่ให้หัวไหล่ลอยขึ้นจากพื้น จากนั้นค่อยๆ หมุนกลับลงมาจากสะโพกเท่าที่ทำได้(ท่านสามารถหมุนตามจังหวะเมโทรโนมตามที่นักกายภาพบำบัดแนะนำได้) หายใจเข้า-ออกลึกๆ ทำซ้ำ 10 ครั้งหรือจนรู้สึกผ่อนคลาย

### บันทึกการฝึกออกกำลังกาย

|                                    |                                    |                                               |                                    |                                               |                                               |                                    |
|------------------------------------|------------------------------------|-----------------------------------------------|------------------------------------|-----------------------------------------------|-----------------------------------------------|------------------------------------|
| <input type="checkbox"/> วันที่ 1  | <input type="checkbox"/> วันที่ 2  | <input checked="" type="checkbox"/> วันที่ 3  | <input type="checkbox"/> วันที่ 4  | <input checked="" type="checkbox"/> วันที่ 5  | <input checked="" type="checkbox"/> วันที่ 6  | <input type="checkbox"/> วันที่ 7  |
| <input type="checkbox"/> วันที่ 8  | <input type="checkbox"/> วันที่ 9  | <input type="checkbox"/> วันที่ 10            | <input type="checkbox"/> วันที่ 11 | <input type="checkbox"/> วันที่ 12            | <input type="checkbox"/> วันที่ 13            | <input type="checkbox"/> วันที่ 14 |
| <input type="checkbox"/> วันที่ 15 | <input type="checkbox"/> วันที่ 16 | <input checked="" type="checkbox"/> วันที่ 17 | <input type="checkbox"/> วันที่ 18 | <input checked="" type="checkbox"/> วันที่ 19 | <input checked="" type="checkbox"/> วันที่ 20 | <input type="checkbox"/> วันที่ 21 |
| <input type="checkbox"/> วันที่ 22 | <input type="checkbox"/> วันที่ 23 | <input type="checkbox"/> วันที่ 24            | <input type="checkbox"/> วันที่ 25 | <input type="checkbox"/> วันที่ 26            | <input type="checkbox"/> วันที่ 27            | <input type="checkbox"/> วันที่ 28 |
| <input type="checkbox"/> วันที่ 29 | <input type="checkbox"/> วันที่ 30 | <input checked="" type="checkbox"/> วันที่ 31 | <input type="checkbox"/> วันที่ 32 | <input checked="" type="checkbox"/> วันที่ 33 | <input checked="" type="checkbox"/> วันที่ 34 | <input type="checkbox"/> วันที่ 35 |
| <input type="checkbox"/> วันที่ 36 | <input type="checkbox"/> วันที่ 37 | <input type="checkbox"/> วันที่ 38            | <input type="checkbox"/> วันที่ 39 | <input type="checkbox"/> วันที่ 40            | <input type="checkbox"/> วันที่ 41            | <input type="checkbox"/> วันที่ 42 |
| <input type="checkbox"/> วันที่ 43 | <input type="checkbox"/> วันที่ 44 | <input checked="" type="checkbox"/> วันที่ 45 | <input type="checkbox"/> วันที่ 46 | <input checked="" type="checkbox"/> วันที่ 47 | <input checked="" type="checkbox"/> วันที่ 48 | <input type="checkbox"/> วันที่ 49 |
| <input type="checkbox"/> วันที่ 50 | <input type="checkbox"/> วันที่ 51 | <input checked="" type="checkbox"/> วันที่ 52 | <input type="checkbox"/> วันที่ 53 | <input checked="" type="checkbox"/> วันที่ 54 | <input checked="" type="checkbox"/> วันที่ 55 | <input type="checkbox"/> วันที่ 56 |
| <input type="checkbox"/> วันที่ 57 | <input type="checkbox"/> วันที่ 58 | <input checked="" type="checkbox"/> วันที่ 59 | <input type="checkbox"/> วันที่ 60 | <input type="checkbox"/> วันที่ 61            | <input checked="" type="checkbox"/> วันที่ 62 | <input type="checkbox"/> วันที่ 63 |
| <input type="checkbox"/> วันที่ 64 | <input type="checkbox"/> วันที่ 65 | <input checked="" type="checkbox"/> วันที่ 66 | <input type="checkbox"/> วันที่ 67 | <input checked="" type="checkbox"/> วันที่ 68 | <input checked="" type="checkbox"/> วันที่ 69 | <input type="checkbox"/> วันที่ 70 |
| <input type="checkbox"/> วันที่ 71 | <input type="checkbox"/> วันที่ 72 | <input type="checkbox"/> วันที่ 73            | <input type="checkbox"/> วันที่ 74 | <input type="checkbox"/> วันที่ 75            |                                               |                                    |

## ท่าที่ 5 : ฝึกหมุนคอ

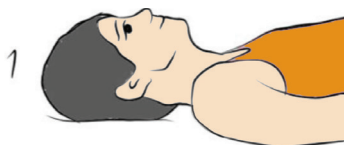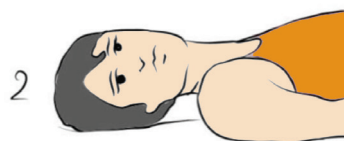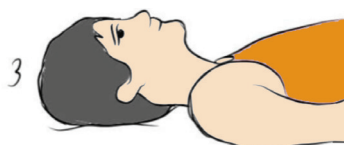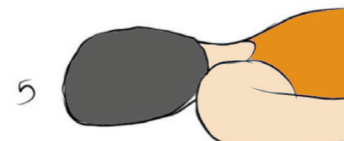

**ท่าเริ่ม:** ท่านอนหงายราบกับพื้น ศีรษะและคอปล่อยสบายๆ ไม่ก้มหรือหงายจนเกินไป

**ท่าออกกำลังกาย:** ตำแหน่งคออยู่ในแนวตรงแล้ว ให้ท่านค่อยๆ หันศีรษะไปทางขวาช้าๆ จากนั้นหันศีรษะกลับมาตำแหน่งเริ่มต้น และเปลี่ยนเป็นหันศีรษะไปทางด้านซ้ายเช่นเดียวกัน (ท่านสามารถหมุนตามจังหวะเมโทรโนมตามที่นักกายภาพบำบัดแนะนำได้) ทำจนรู้สึกผ่อนคลาย

### บันทึกการฝึกออกกำลังกาย

|                                    |                                    |                                               |                                    |                                               |                                               |                                    |
|------------------------------------|------------------------------------|-----------------------------------------------|------------------------------------|-----------------------------------------------|-----------------------------------------------|------------------------------------|
| <input type="checkbox"/> วันที่ 1  | <input type="checkbox"/> วันที่ 2  | <input checked="" type="checkbox"/> วันที่ 3  | <input type="checkbox"/> วันที่ 4  | <input checked="" type="checkbox"/> วันที่ 5  | <input checked="" type="checkbox"/> วันที่ 6  | <input type="checkbox"/> วันที่ 7  |
| <input type="checkbox"/> วันที่ 8  | <input type="checkbox"/> วันที่ 9  | <input type="checkbox"/> วันที่ 10            | <input type="checkbox"/> วันที่ 11 | <input type="checkbox"/> วันที่ 12            | <input type="checkbox"/> วันที่ 13            | <input type="checkbox"/> วันที่ 14 |
| <input type="checkbox"/> วันที่ 15 | <input type="checkbox"/> วันที่ 16 | <input checked="" type="checkbox"/> วันที่ 17 | <input type="checkbox"/> วันที่ 18 | <input checked="" type="checkbox"/> วันที่ 19 | <input checked="" type="checkbox"/> วันที่ 20 | <input type="checkbox"/> วันที่ 21 |
| <input type="checkbox"/> วันที่ 22 | <input type="checkbox"/> วันที่ 23 | <input type="checkbox"/> วันที่ 24            | <input type="checkbox"/> วันที่ 25 | <input type="checkbox"/> วันที่ 26            | <input type="checkbox"/> วันที่ 27            | <input type="checkbox"/> วันที่ 28 |
| <input type="checkbox"/> วันที่ 29 | <input type="checkbox"/> วันที่ 30 | <input checked="" type="checkbox"/> วันที่ 31 | <input type="checkbox"/> วันที่ 32 | <input checked="" type="checkbox"/> วันที่ 33 | <input checked="" type="checkbox"/> วันที่ 34 | <input type="checkbox"/> วันที่ 35 |
| <input type="checkbox"/> วันที่ 36 | <input type="checkbox"/> วันที่ 37 | <input type="checkbox"/> วันที่ 38            | <input type="checkbox"/> วันที่ 39 | <input type="checkbox"/> วันที่ 40            | <input type="checkbox"/> วันที่ 41            | <input type="checkbox"/> วันที่ 42 |
| <input type="checkbox"/> วันที่ 43 | <input type="checkbox"/> วันที่ 44 | <input checked="" type="checkbox"/> วันที่ 45 | <input type="checkbox"/> วันที่ 46 | <input checked="" type="checkbox"/> วันที่ 47 | <input checked="" type="checkbox"/> วันที่ 48 | <input type="checkbox"/> วันที่ 49 |
| <input type="checkbox"/> วันที่ 50 | <input type="checkbox"/> วันที่ 51 | <input checked="" type="checkbox"/> วันที่ 52 | <input type="checkbox"/> วันที่ 53 | <input checked="" type="checkbox"/> วันที่ 54 | <input checked="" type="checkbox"/> วันที่ 55 | <input type="checkbox"/> วันที่ 56 |
| <input type="checkbox"/> วันที่ 57 | <input type="checkbox"/> วันที่ 58 | <input checked="" type="checkbox"/> วันที่ 59 | <input type="checkbox"/> วันที่ 60 | <input type="checkbox"/> วันที่ 61            | <input checked="" type="checkbox"/> วันที่ 62 | <input type="checkbox"/> วันที่ 63 |
| <input type="checkbox"/> วันที่ 64 | <input type="checkbox"/> วันที่ 65 | <input checked="" type="checkbox"/> วันที่ 66 | <input type="checkbox"/> วันที่ 67 | <input checked="" type="checkbox"/> วันที่ 68 | <input checked="" type="checkbox"/> วันที่ 69 | <input type="checkbox"/> วันที่ 70 |
| <input type="checkbox"/> วันที่ 71 | <input type="checkbox"/> วันที่ 72 | <input type="checkbox"/> วันที่ 73            | <input type="checkbox"/> วันที่ 74 | <input type="checkbox"/> วันที่ 75            |                                               |                                    |

## ท่าที่ 6 : ฝึกรวมท่าออกกำลังกายข้อ 1-5

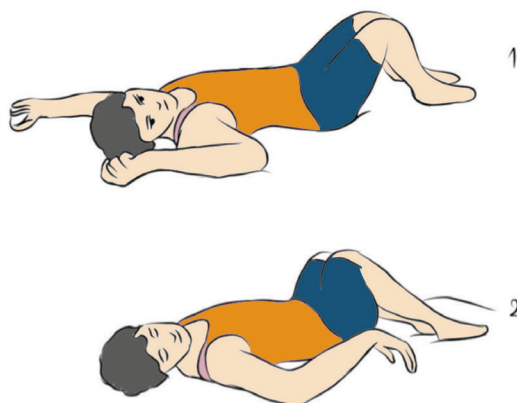

**ท่าเริ่ม:** นอนหงายราบกับพื้น หน้าตรงผ่อนคลาย ชันเข่าขึ้น ทางแขนออกวางราบข้างศีรษะ งอศอก 90 องศา

**ท่าออกกำลังกาย:** บิดหมุนแขนขึ้นไปทางศีรษะ หมุนคอมาทางขวา หมุนสะโพกและเข้าไทางซ้าย จากนั้นกลับมำท่าตรงและเปลี่ยนเป็นหมุนแขนลงไปทางสะโพก หมุนคอมาทางซ้าย หมุนสะโพกและเข้าไทางขวา (ท่านสามารถหมุนตามจังหวะเมโทรโนมตามที่นักกายภาพบำบัดแนะนำได้) ทำจนรู้สึกผ่อนคลาย

### บันทึกการฝึกออกกำลังกาย

|                                    |                                    |                                               |                                    |                                               |                                               |                                    |
|------------------------------------|------------------------------------|-----------------------------------------------|------------------------------------|-----------------------------------------------|-----------------------------------------------|------------------------------------|
| <input type="checkbox"/> วันที่ 1  | <input type="checkbox"/> วันที่ 2  | <input checked="" type="checkbox"/> วันที่ 3  | <input type="checkbox"/> วันที่ 4  | <input checked="" type="checkbox"/> วันที่ 5  | <input checked="" type="checkbox"/> วันที่ 6  | <input type="checkbox"/> วันที่ 7  |
| <input type="checkbox"/> วันที่ 8  | <input type="checkbox"/> วันที่ 9  | <input type="checkbox"/> วันที่ 10            | <input type="checkbox"/> วันที่ 11 | <input type="checkbox"/> วันที่ 12            | <input type="checkbox"/> วันที่ 13            | <input type="checkbox"/> วันที่ 14 |
| <input type="checkbox"/> วันที่ 15 | <input type="checkbox"/> วันที่ 16 | <input checked="" type="checkbox"/> วันที่ 17 | <input type="checkbox"/> วันที่ 18 | <input checked="" type="checkbox"/> วันที่ 19 | <input checked="" type="checkbox"/> วันที่ 20 | <input type="checkbox"/> วันที่ 21 |
| <input type="checkbox"/> วันที่ 22 | <input type="checkbox"/> วันที่ 23 | <input type="checkbox"/> วันที่ 24            | <input type="checkbox"/> วันที่ 25 | <input type="checkbox"/> วันที่ 26            | <input type="checkbox"/> วันที่ 27            | <input type="checkbox"/> วันที่ 28 |
| <input type="checkbox"/> วันที่ 29 | <input type="checkbox"/> วันที่ 30 | <input checked="" type="checkbox"/> วันที่ 31 | <input type="checkbox"/> วันที่ 32 | <input checked="" type="checkbox"/> วันที่ 33 | <input checked="" type="checkbox"/> วันที่ 34 | <input type="checkbox"/> วันที่ 35 |
| <input type="checkbox"/> วันที่ 36 | <input type="checkbox"/> วันที่ 37 | <input type="checkbox"/> วันที่ 38            | <input type="checkbox"/> วันที่ 39 | <input type="checkbox"/> วันที่ 40            | <input type="checkbox"/> วันที่ 41            | <input type="checkbox"/> วันที่ 42 |
| <input type="checkbox"/> วันที่ 43 | <input type="checkbox"/> วันที่ 44 | <input checked="" type="checkbox"/> วันที่ 45 | <input type="checkbox"/> วันที่ 46 | <input checked="" type="checkbox"/> วันที่ 47 | <input checked="" type="checkbox"/> วันที่ 48 | <input type="checkbox"/> วันที่ 49 |
| <input type="checkbox"/> วันที่ 50 | <input type="checkbox"/> วันที่ 51 | <input checked="" type="checkbox"/> วันที่ 52 | <input type="checkbox"/> วันที่ 53 | <input checked="" type="checkbox"/> วันที่ 54 | <input checked="" type="checkbox"/> วันที่ 55 | <input type="checkbox"/> วันที่ 56 |
| <input type="checkbox"/> วันที่ 57 | <input type="checkbox"/> วันที่ 58 | <input checked="" type="checkbox"/> วันที่ 59 | <input type="checkbox"/> วันที่ 60 | <input type="checkbox"/> วันที่ 61            | <input checked="" type="checkbox"/> วันที่ 62 | <input type="checkbox"/> วันที่ 63 |
| <input type="checkbox"/> วันที่ 64 | <input type="checkbox"/> วันที่ 65 | <input checked="" type="checkbox"/> วันที่ 66 | <input type="checkbox"/> วันที่ 67 | <input checked="" type="checkbox"/> วันที่ 68 | <input checked="" type="checkbox"/> วันที่ 69 | <input type="checkbox"/> วันที่ 70 |
| <input type="checkbox"/> วันที่ 71 | <input type="checkbox"/> วันที่ 72 | <input type="checkbox"/> วันที่ 73            | <input type="checkbox"/> วันที่ 74 | <input type="checkbox"/> วันที่ 75            |                                               |                                    |

## ท่าที่ 7 : ฝึกการเอื้อมไปและกลับร่วมกับการหมุนลำตัวส่วนบน

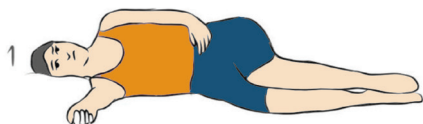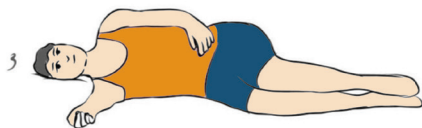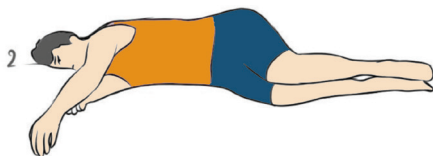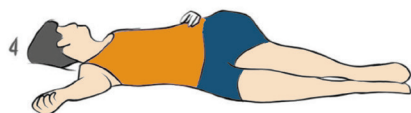

**ท่าเริ่ม:** นอนตะแคงขวา วางแขนขวาบนเตียงโดยยื่นแขนมาข้างหน้า แขนซ้ายอยู่บนลำตัว งอเข่า สะโพก

**ท่าออกกำลังกาย:** เอื้อมแขนซ้ายไปข้างหน้าและถอยกลับให้มากที่สุดเท่าที่จะทำได้ โดยหมุนลำตัวไปด้วยทั้งไปและกลับ เหยียดข้อศอกไปข้างหน้า และงอข้อศอกกลับ และพยายามให้สะโพกอยู่กับที่ ทำจนรู้สึกผ่อนคลาย และเปลี่ยนไปนอนตะแคงซ้าย ทำเช่นนี้เอื้อมแขนขวาไปข้างหน้าและถอยกลับให้มากที่สุดเท่าที่จะทำได้ โดยหมุนลำตัวไปด้วยทั้งไปและกลับ เหยียดข้อศอกไปข้างหน้า และงอข้อศอกกลับ (ท่านสามารถหมุนตามจังหวะเมโทรโนมตามที่มีนักกายภาพบำบัดแนะนำได้) ทำจนรู้สึกผ่อนคลาย

### บันทึกการฝึกออกกำลังกาย

|                                    |                                    |                                               |                                    |                                               |                                               |                                    |
|------------------------------------|------------------------------------|-----------------------------------------------|------------------------------------|-----------------------------------------------|-----------------------------------------------|------------------------------------|
| <input type="checkbox"/> วันที่ 1  | <input type="checkbox"/> วันที่ 2  | <input checked="" type="checkbox"/> วันที่ 3  | <input type="checkbox"/> วันที่ 4  | <input checked="" type="checkbox"/> วันที่ 5  | <input checked="" type="checkbox"/> วันที่ 6  | <input type="checkbox"/> วันที่ 7  |
| <input type="checkbox"/> วันที่ 8  | <input type="checkbox"/> วันที่ 9  | <input type="checkbox"/> วันที่ 10            | <input type="checkbox"/> วันที่ 11 | <input type="checkbox"/> วันที่ 12            | <input type="checkbox"/> วันที่ 13            | <input type="checkbox"/> วันที่ 14 |
| <input type="checkbox"/> วันที่ 15 | <input type="checkbox"/> วันที่ 16 | <input checked="" type="checkbox"/> วันที่ 17 | <input type="checkbox"/> วันที่ 18 | <input checked="" type="checkbox"/> วันที่ 19 | <input checked="" type="checkbox"/> วันที่ 20 | <input type="checkbox"/> วันที่ 21 |
| <input type="checkbox"/> วันที่ 22 | <input type="checkbox"/> วันที่ 23 | <input type="checkbox"/> วันที่ 24            | <input type="checkbox"/> วันที่ 25 | <input type="checkbox"/> วันที่ 26            | <input type="checkbox"/> วันที่ 27            | <input type="checkbox"/> วันที่ 28 |
| <input type="checkbox"/> วันที่ 29 | <input type="checkbox"/> วันที่ 30 | <input checked="" type="checkbox"/> วันที่ 31 | <input type="checkbox"/> วันที่ 32 | <input checked="" type="checkbox"/> วันที่ 33 | <input checked="" type="checkbox"/> วันที่ 34 | <input type="checkbox"/> วันที่ 35 |
| <input type="checkbox"/> วันที่ 36 | <input type="checkbox"/> วันที่ 37 | <input type="checkbox"/> วันที่ 38            | <input type="checkbox"/> วันที่ 39 | <input type="checkbox"/> วันที่ 40            | <input type="checkbox"/> วันที่ 41            | <input type="checkbox"/> วันที่ 42 |
| <input type="checkbox"/> วันที่ 43 | <input type="checkbox"/> วันที่ 44 | <input checked="" type="checkbox"/> วันที่ 45 | <input type="checkbox"/> วันที่ 46 | <input checked="" type="checkbox"/> วันที่ 47 | <input checked="" type="checkbox"/> วันที่ 48 | <input type="checkbox"/> วันที่ 49 |
| <input type="checkbox"/> วันที่ 50 | <input type="checkbox"/> วันที่ 51 | <input checked="" type="checkbox"/> วันที่ 52 | <input type="checkbox"/> วันที่ 53 | <input checked="" type="checkbox"/> วันที่ 54 | <input checked="" type="checkbox"/> วันที่ 55 | <input type="checkbox"/> วันที่ 56 |
| <input type="checkbox"/> วันที่ 57 | <input type="checkbox"/> วันที่ 58 | <input checked="" type="checkbox"/> วันที่ 59 | <input type="checkbox"/> วันที่ 60 | <input type="checkbox"/> วันที่ 61            | <input checked="" type="checkbox"/> วันที่ 62 | <input type="checkbox"/> วันที่ 63 |
| <input type="checkbox"/> วันที่ 64 | <input type="checkbox"/> วันที่ 65 | <input checked="" type="checkbox"/> วันที่ 66 | <input type="checkbox"/> วันที่ 67 | <input checked="" type="checkbox"/> วันที่ 68 | <input checked="" type="checkbox"/> วันที่ 69 | <input type="checkbox"/> วันที่ 70 |
| <input type="checkbox"/> วันที่ 71 | <input type="checkbox"/> วันที่ 72 | <input type="checkbox"/> วันที่ 73            | <input type="checkbox"/> วันที่ 74 | <input type="checkbox"/> วันที่ 75            |                                               |                                    |

## ท่าที่ 8 : ฝึกหมุนเชิงกราน

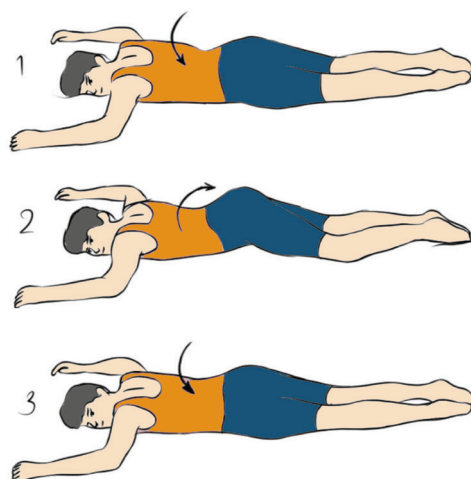

**ท่าเริ่ม:** นอนคว่ำ

**ท่าฝึก:** หมุนเชิงกรานขวาตกลงที่เตียงแบบเบา ๆ และช้าๆ จากนั้นหมุนขึ้นโดยยกสะโพกขึ้นเล็กน้อย ทำซ้ำจนรู้สึกผ่อนคลาย จากนั้นสลับข้าง หมุนเชิงกรานซ้ายลง โดยตกลงที่เตียงแบบเบา ๆ และช้าๆ จากนั้นหมุนขึ้นโดยยกสะโพกขึ้นเล็กน้อย ทำซ้ำจนรู้สึกผ่อนคลาย

บันทึกการฝึกออกกำลังกาย

|                                    |                                    |                                               |                                    |                                               |                                               |                                    |
|------------------------------------|------------------------------------|-----------------------------------------------|------------------------------------|-----------------------------------------------|-----------------------------------------------|------------------------------------|
| <input type="checkbox"/> วันที่ 1  | <input type="checkbox"/> วันที่ 2  | <input checked="" type="checkbox"/> วันที่ 3  | <input type="checkbox"/> วันที่ 4  | <input checked="" type="checkbox"/> วันที่ 5  | <input checked="" type="checkbox"/> วันที่ 6  | <input type="checkbox"/> วันที่ 7  |
| <input type="checkbox"/> วันที่ 8  | <input type="checkbox"/> วันที่ 9  | <input type="checkbox"/> วันที่ 10            | <input type="checkbox"/> วันที่ 11 | <input type="checkbox"/> วันที่ 12            | <input type="checkbox"/> วันที่ 13            | <input type="checkbox"/> วันที่ 14 |
| <input type="checkbox"/> วันที่ 15 | <input type="checkbox"/> วันที่ 16 | <input checked="" type="checkbox"/> วันที่ 17 | <input type="checkbox"/> วันที่ 18 | <input checked="" type="checkbox"/> วันที่ 19 | <input checked="" type="checkbox"/> วันที่ 20 | <input type="checkbox"/> วันที่ 21 |
| <input type="checkbox"/> วันที่ 22 | <input type="checkbox"/> วันที่ 23 | <input type="checkbox"/> วันที่ 24            | <input type="checkbox"/> วันที่ 25 | <input type="checkbox"/> วันที่ 26            | <input type="checkbox"/> วันที่ 27            | <input type="checkbox"/> วันที่ 28 |
| <input type="checkbox"/> วันที่ 29 | <input type="checkbox"/> วันที่ 30 | <input checked="" type="checkbox"/> วันที่ 31 | <input type="checkbox"/> วันที่ 32 | <input checked="" type="checkbox"/> วันที่ 33 | <input checked="" type="checkbox"/> วันที่ 34 | <input type="checkbox"/> วันที่ 35 |
| <input type="checkbox"/> วันที่ 36 | <input type="checkbox"/> วันที่ 37 | <input type="checkbox"/> วันที่ 38            | <input type="checkbox"/> วันที่ 39 | <input type="checkbox"/> วันที่ 40            | <input type="checkbox"/> วันที่ 41            | <input type="checkbox"/> วันที่ 42 |
| <input type="checkbox"/> วันที่ 43 | <input type="checkbox"/> วันที่ 44 | <input checked="" type="checkbox"/> วันที่ 45 | <input type="checkbox"/> วันที่ 46 | <input checked="" type="checkbox"/> วันที่ 47 | <input checked="" type="checkbox"/> วันที่ 48 | <input type="checkbox"/> วันที่ 49 |
| <input type="checkbox"/> วันที่ 50 | <input type="checkbox"/> วันที่ 51 | <input checked="" type="checkbox"/> วันที่ 52 | <input type="checkbox"/> วันที่ 53 | <input checked="" type="checkbox"/> วันที่ 54 | <input checked="" type="checkbox"/> วันที่ 55 | <input type="checkbox"/> วันที่ 56 |
| <input type="checkbox"/> วันที่ 57 | <input type="checkbox"/> วันที่ 58 | <input checked="" type="checkbox"/> วันที่ 59 | <input type="checkbox"/> วันที่ 60 | <input type="checkbox"/> วันที่ 61            | <input checked="" type="checkbox"/> วันที่ 62 | <input type="checkbox"/> วันที่ 63 |
| <input type="checkbox"/> วันที่ 64 | <input type="checkbox"/> วันที่ 65 | <input checked="" type="checkbox"/> วันที่ 66 | <input type="checkbox"/> วันที่ 67 | <input checked="" type="checkbox"/> วันที่ 68 | <input checked="" type="checkbox"/> วันที่ 69 | <input type="checkbox"/> วันที่ 70 |
| <input type="checkbox"/> วันที่ 71 | <input type="checkbox"/> วันที่ 72 | <input type="checkbox"/> วันที่ 73            | <input type="checkbox"/> วันที่ 74 | <input type="checkbox"/> วันที่ 75            |                                               |                                    |

## ท่าที่ 11 : การฝึกหมุนสะโพกเป็นวงกลม

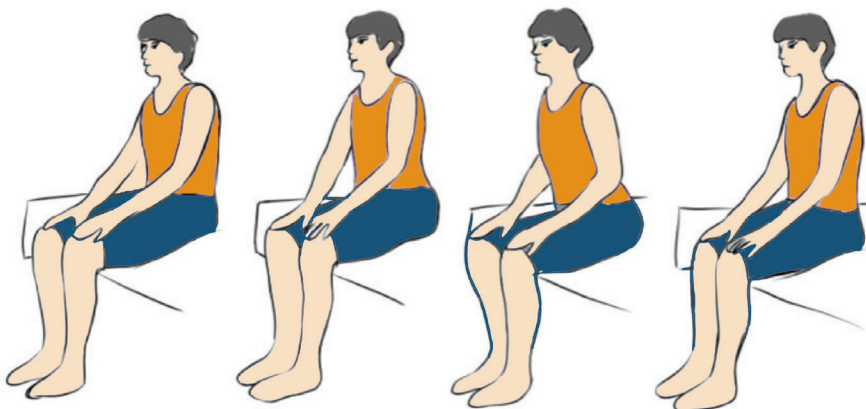

**ท่าเริ่ม:** นั่งบนเก้าอี้หรือเตียง โดยลำตัวตรง และวางเท้าวางราบกับพื้น

**ท่าฝึก:** ท่านค่อยๆ แอนหลังส่วนล่างเล็กน้อย ถ่ายน้ำหนักไปทางสะโพกขวา งอหลังส่วนล่าง ถ่ายน้ำหนักมาที่สะโพกซ้าย ทำซ้ำๆ และพยายามให้ราบเรียบ คล้ายๆ เล่น ฮูลาฮูป จากนั้นเปลี่ยนเป็น หมุนไปอีกข้างทำตามและทวนเข็มนาฬิกา ทำจนรู้สึกผ่อนคลาย

### บันทึกการฝึกออกกำลังกาย

|                                    |                                    |                                               |                                    |                                               |                                               |                                    |
|------------------------------------|------------------------------------|-----------------------------------------------|------------------------------------|-----------------------------------------------|-----------------------------------------------|------------------------------------|
| <input type="checkbox"/> วันที่ 1  | <input type="checkbox"/> วันที่ 2  | <input checked="" type="checkbox"/> วันที่ 3  | <input type="checkbox"/> วันที่ 4  | <input checked="" type="checkbox"/> วันที่ 5  | <input checked="" type="checkbox"/> วันที่ 6  | <input type="checkbox"/> วันที่ 7  |
| <input type="checkbox"/> วันที่ 8  | <input type="checkbox"/> วันที่ 9  | <input type="checkbox"/> วันที่ 10            | <input type="checkbox"/> วันที่ 11 | <input type="checkbox"/> วันที่ 12            | <input type="checkbox"/> วันที่ 13            | <input type="checkbox"/> วันที่ 14 |
| <input type="checkbox"/> วันที่ 15 | <input type="checkbox"/> วันที่ 16 | <input checked="" type="checkbox"/> วันที่ 17 | <input type="checkbox"/> วันที่ 18 | <input checked="" type="checkbox"/> วันที่ 19 | <input checked="" type="checkbox"/> วันที่ 20 | <input type="checkbox"/> วันที่ 21 |
| <input type="checkbox"/> วันที่ 22 | <input type="checkbox"/> วันที่ 23 | <input type="checkbox"/> วันที่ 24            | <input type="checkbox"/> วันที่ 25 | <input type="checkbox"/> วันที่ 26            | <input type="checkbox"/> วันที่ 27            | <input type="checkbox"/> วันที่ 28 |
| <input type="checkbox"/> วันที่ 29 | <input type="checkbox"/> วันที่ 30 | <input checked="" type="checkbox"/> วันที่ 31 | <input type="checkbox"/> วันที่ 32 | <input checked="" type="checkbox"/> วันที่ 33 | <input checked="" type="checkbox"/> วันที่ 34 | <input type="checkbox"/> วันที่ 35 |
| <input type="checkbox"/> วันที่ 36 | <input type="checkbox"/> วันที่ 37 | <input type="checkbox"/> วันที่ 38            | <input type="checkbox"/> วันที่ 39 | <input type="checkbox"/> วันที่ 40            | <input type="checkbox"/> วันที่ 41            | <input type="checkbox"/> วันที่ 42 |
| <input type="checkbox"/> วันที่ 43 | <input type="checkbox"/> วันที่ 44 | <input checked="" type="checkbox"/> วันที่ 45 | <input type="checkbox"/> วันที่ 46 | <input checked="" type="checkbox"/> วันที่ 47 | <input checked="" type="checkbox"/> วันที่ 48 | <input type="checkbox"/> วันที่ 49 |
| <input type="checkbox"/> วันที่ 50 | <input type="checkbox"/> วันที่ 51 | <input checked="" type="checkbox"/> วันที่ 52 | <input type="checkbox"/> วันที่ 53 | <input checked="" type="checkbox"/> วันที่ 54 | <input checked="" type="checkbox"/> วันที่ 55 | <input type="checkbox"/> วันที่ 56 |
| <input type="checkbox"/> วันที่ 57 | <input type="checkbox"/> วันที่ 58 | <input checked="" type="checkbox"/> วันที่ 59 | <input type="checkbox"/> วันที่ 60 | <input type="checkbox"/> วันที่ 61            | <input checked="" type="checkbox"/> วันที่ 62 | <input type="checkbox"/> วันที่ 63 |
| <input type="checkbox"/> วันที่ 64 | <input type="checkbox"/> วันที่ 65 | <input checked="" type="checkbox"/> วันที่ 66 | <input type="checkbox"/> วันที่ 67 | <input checked="" type="checkbox"/> วันที่ 68 | <input checked="" type="checkbox"/> วันที่ 69 | <input type="checkbox"/> วันที่ 70 |
| <input type="checkbox"/> วันที่ 71 | <input type="checkbox"/> วันที่ 72 | <input type="checkbox"/> วันที่ 73            | <input type="checkbox"/> วันที่ 74 | <input type="checkbox"/> วันที่ 75            |                                               |                                    |

## ท่าที่ 10 : การฝึกโน้มตัวไปข้างหน้าในท่านั่ง

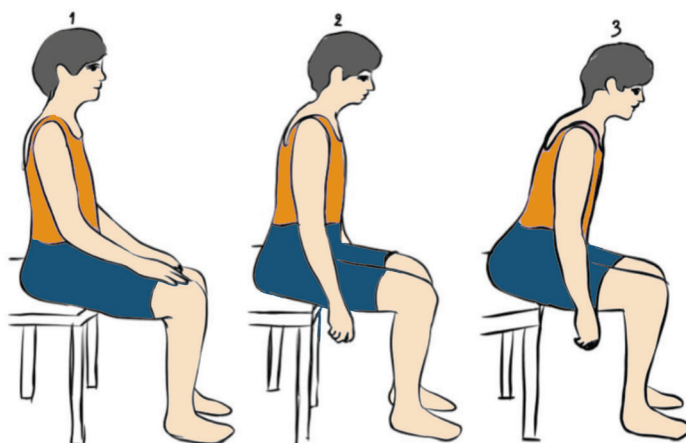

**ท่าเริ่ม:** ท่านั่งบนเก้าอี้หรือเตียง โดยลำตัวตรง และวางเท้าติดกับพื้น

**ท่าฝึก:** หมุนสะโพกไปทางด้านหน้า โดยให้หลังส่วนเอวแอ่นเล็กน้อย โน้มตัวลง จนลำตัวถ่ายน้ำหนัก และเคลื่อนมาที่ขา ท่านต้องแน่ใจว่าหลังส่วนเอวยังแอ่น และศีรษะยังตั้งตรงอยู่ (ท่านสามารถทำตามจังหวะเมโทรโนมตามที่นักกายภาพบำบัดแนะนำได้) ทำจนรู้สึกผ่อนคลาย

### บันทึกการฝึกออกกำลังกาย

|                                    |                                    |                                               |                                    |                                               |                                               |                                    |
|------------------------------------|------------------------------------|-----------------------------------------------|------------------------------------|-----------------------------------------------|-----------------------------------------------|------------------------------------|
| <input type="checkbox"/> วันที่ 1  | <input type="checkbox"/> วันที่ 2  | <input checked="" type="checkbox"/> วันที่ 3  | <input type="checkbox"/> วันที่ 4  | <input checked="" type="checkbox"/> วันที่ 5  | <input checked="" type="checkbox"/> วันที่ 6  | <input type="checkbox"/> วันที่ 7  |
| <input type="checkbox"/> วันที่ 8  | <input type="checkbox"/> วันที่ 9  | <input type="checkbox"/> วันที่ 10            | <input type="checkbox"/> วันที่ 11 | <input type="checkbox"/> วันที่ 12            | <input type="checkbox"/> วันที่ 13            | <input type="checkbox"/> วันที่ 14 |
| <input type="checkbox"/> วันที่ 15 | <input type="checkbox"/> วันที่ 16 | <input checked="" type="checkbox"/> วันที่ 17 | <input type="checkbox"/> วันที่ 18 | <input checked="" type="checkbox"/> วันที่ 19 | <input checked="" type="checkbox"/> วันที่ 20 | <input type="checkbox"/> วันที่ 21 |
| <input type="checkbox"/> วันที่ 22 | <input type="checkbox"/> วันที่ 23 | <input type="checkbox"/> วันที่ 24            | <input type="checkbox"/> วันที่ 25 | <input type="checkbox"/> วันที่ 26            | <input type="checkbox"/> วันที่ 27            | <input type="checkbox"/> วันที่ 28 |
| <input type="checkbox"/> วันที่ 29 | <input type="checkbox"/> วันที่ 30 | <input checked="" type="checkbox"/> วันที่ 31 | <input type="checkbox"/> วันที่ 32 | <input checked="" type="checkbox"/> วันที่ 33 | <input checked="" type="checkbox"/> วันที่ 34 | <input type="checkbox"/> วันที่ 35 |
| <input type="checkbox"/> วันที่ 36 | <input type="checkbox"/> วันที่ 37 | <input type="checkbox"/> วันที่ 38            | <input type="checkbox"/> วันที่ 39 | <input type="checkbox"/> วันที่ 40            | <input type="checkbox"/> วันที่ 41            | <input type="checkbox"/> วันที่ 42 |
| <input type="checkbox"/> วันที่ 43 | <input type="checkbox"/> วันที่ 44 | <input checked="" type="checkbox"/> วันที่ 45 | <input type="checkbox"/> วันที่ 46 | <input checked="" type="checkbox"/> วันที่ 47 | <input checked="" type="checkbox"/> วันที่ 48 | <input type="checkbox"/> วันที่ 49 |
| <input type="checkbox"/> วันที่ 50 | <input type="checkbox"/> วันที่ 51 | <input checked="" type="checkbox"/> วันที่ 52 | <input type="checkbox"/> วันที่ 53 | <input checked="" type="checkbox"/> วันที่ 54 | <input checked="" type="checkbox"/> วันที่ 55 | <input type="checkbox"/> วันที่ 56 |
| <input type="checkbox"/> วันที่ 57 | <input type="checkbox"/> วันที่ 58 | <input checked="" type="checkbox"/> วันที่ 59 | <input type="checkbox"/> วันที่ 60 | <input type="checkbox"/> วันที่ 61            | <input checked="" type="checkbox"/> วันที่ 62 | <input type="checkbox"/> วันที่ 63 |
| <input type="checkbox"/> วันที่ 64 | <input type="checkbox"/> วันที่ 65 | <input checked="" type="checkbox"/> วันที่ 66 | <input type="checkbox"/> วันที่ 67 | <input checked="" type="checkbox"/> วันที่ 68 | <input checked="" type="checkbox"/> วันที่ 69 | <input type="checkbox"/> วันที่ 70 |
| <input type="checkbox"/> วันที่ 71 | <input type="checkbox"/> วันที่ 72 | <input type="checkbox"/> วันที่ 73            | <input type="checkbox"/> วันที่ 74 | <input type="checkbox"/> วันที่ 75            |                                               |                                    |



## ท่าที่ 9 : ฝึกหมุนสะโพกท่านอนคว่ำ

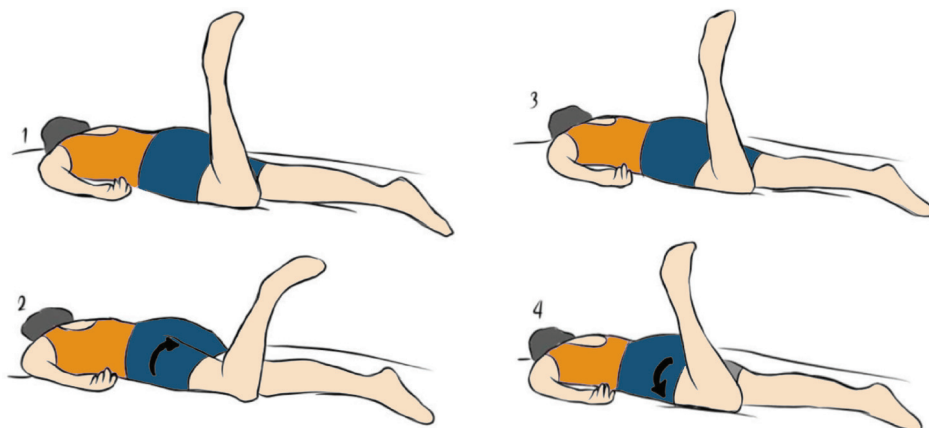

**ท่าเริ่ม:** นอนคว่ำ งอเข่าข้างขวา เก้าอี้ขึ้น

**ท่าฝึก:** หมุนสะโพกขวาเข้าด้านใน สลับกับหมุนออกด้านนอกซ้ายๆ ทำจนรู้สึกผ่อนคลาย จากนั้นสลับข้างงอเข่าข้างซ้ายเก้าอี้ขึ้นหมุนสะโพกซ้ายเข้าด้านในสลับกับหมุนออกด้านนอกซ้ายๆ(ท่านสามารถหมุนตามจังหวะเมโทรโนมตามที่คุณกายภาพบำบัดแนะนำได้) ทำจนรู้สึกผ่อนคลาย

### บันทึกการฝึกออกกำลังกาย

|                                    |                                    |                                               |                                    |                                               |                                               |                                    |
|------------------------------------|------------------------------------|-----------------------------------------------|------------------------------------|-----------------------------------------------|-----------------------------------------------|------------------------------------|
| <input type="checkbox"/> วันที่ 1  | <input type="checkbox"/> วันที่ 2  | <input checked="" type="checkbox"/> วันที่ 3  | <input type="checkbox"/> วันที่ 4  | <input checked="" type="checkbox"/> วันที่ 5  | <input checked="" type="checkbox"/> วันที่ 6  | <input type="checkbox"/> วันที่ 7  |
| <input type="checkbox"/> วันที่ 8  | <input type="checkbox"/> วันที่ 9  | <input type="checkbox"/> วันที่ 10            | <input type="checkbox"/> วันที่ 11 | <input type="checkbox"/> วันที่ 12            | <input type="checkbox"/> วันที่ 13            | <input type="checkbox"/> วันที่ 14 |
| <input type="checkbox"/> วันที่ 15 | <input type="checkbox"/> วันที่ 16 | <input checked="" type="checkbox"/> วันที่ 17 | <input type="checkbox"/> วันที่ 18 | <input checked="" type="checkbox"/> วันที่ 19 | <input checked="" type="checkbox"/> วันที่ 20 | <input type="checkbox"/> วันที่ 21 |
| <input type="checkbox"/> วันที่ 22 | <input type="checkbox"/> วันที่ 23 | <input type="checkbox"/> วันที่ 24            | <input type="checkbox"/> วันที่ 25 | <input type="checkbox"/> วันที่ 26            | <input type="checkbox"/> วันที่ 27            | <input type="checkbox"/> วันที่ 28 |
| <input type="checkbox"/> วันที่ 29 | <input type="checkbox"/> วันที่ 30 | <input checked="" type="checkbox"/> วันที่ 31 | <input type="checkbox"/> วันที่ 32 | <input checked="" type="checkbox"/> วันที่ 33 | <input checked="" type="checkbox"/> วันที่ 34 | <input type="checkbox"/> วันที่ 35 |
| <input type="checkbox"/> วันที่ 36 | <input type="checkbox"/> วันที่ 37 | <input type="checkbox"/> วันที่ 38            | <input type="checkbox"/> วันที่ 39 | <input type="checkbox"/> วันที่ 40            | <input type="checkbox"/> วันที่ 41            | <input type="checkbox"/> วันที่ 42 |
| <input type="checkbox"/> วันที่ 43 | <input type="checkbox"/> วันที่ 44 | <input checked="" type="checkbox"/> วันที่ 45 | <input type="checkbox"/> วันที่ 46 | <input checked="" type="checkbox"/> วันที่ 47 | <input checked="" type="checkbox"/> วันที่ 48 | <input type="checkbox"/> วันที่ 49 |
| <input type="checkbox"/> วันที่ 50 | <input type="checkbox"/> วันที่ 51 | <input checked="" type="checkbox"/> วันที่ 52 | <input type="checkbox"/> วันที่ 53 | <input checked="" type="checkbox"/> วันที่ 54 | <input checked="" type="checkbox"/> วันที่ 55 | <input type="checkbox"/> วันที่ 56 |
| <input type="checkbox"/> วันที่ 57 | <input type="checkbox"/> วันที่ 58 | <input checked="" type="checkbox"/> วันที่ 59 | <input type="checkbox"/> วันที่ 60 | <input type="checkbox"/> วันที่ 61            | <input checked="" type="checkbox"/> วันที่ 62 | <input type="checkbox"/> วันที่ 63 |
| <input type="checkbox"/> วันที่ 64 | <input type="checkbox"/> วันที่ 65 | <input checked="" type="checkbox"/> วันที่ 66 | <input type="checkbox"/> วันที่ 67 | <input checked="" type="checkbox"/> วันที่ 68 | <input checked="" type="checkbox"/> วันที่ 69 | <input type="checkbox"/> วันที่ 70 |
| <input type="checkbox"/> วันที่ 71 | <input type="checkbox"/> วันที่ 72 | <input type="checkbox"/> วันที่ 73            | <input type="checkbox"/> วันที่ 74 | <input type="checkbox"/> วันที่ 75            |                                               |                                    |

## ท่าที่ 12 : การฝึกหมุนลำตัวทำนั่ง

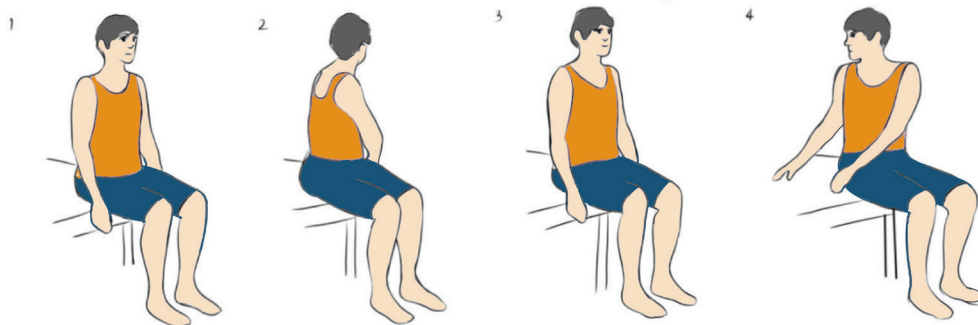

**ท่าเริ่ม:** ท่านั่งบนเก้าอี้หรือเตียง โดยลำตัวตรง และวางเท้าราบกับพื้น

**ท่าฝึก:** หมุนลำตัวไปทางขวาให้ไกลที่สุด โดยก้นต้องติดพื้น จากนั้นค่อย ๆ เปลี่ยนเป็นหมุนลำตัวไปทางซ้ายให้ไกลที่สุด โดยก้นต้องติดพื้นเช่นเดียวกัน (ท่านสามารถหมุนตามจังหวะเมโทรโนมตามที่คุณภาพบำบัดแนะนำได้) ทำจนรู้สึกผ่อนคลาย

### บันทึกการฝึกออกกำลังกาย

|                                    |                                    |                                               |                                    |                                               |                                               |                                    |
|------------------------------------|------------------------------------|-----------------------------------------------|------------------------------------|-----------------------------------------------|-----------------------------------------------|------------------------------------|
| <input type="checkbox"/> วันที่ 1  | <input type="checkbox"/> วันที่ 2  | <input checked="" type="checkbox"/> วันที่ 3  | <input type="checkbox"/> วันที่ 4  | <input checked="" type="checkbox"/> วันที่ 5  | <input checked="" type="checkbox"/> วันที่ 6  | <input type="checkbox"/> วันที่ 7  |
| <input type="checkbox"/> วันที่ 8  | <input type="checkbox"/> วันที่ 9  | <input type="checkbox"/> วันที่ 10            | <input type="checkbox"/> วันที่ 11 | <input type="checkbox"/> วันที่ 12            | <input type="checkbox"/> วันที่ 13            | <input type="checkbox"/> วันที่ 14 |
| <input type="checkbox"/> วันที่ 15 | <input type="checkbox"/> วันที่ 16 | <input checked="" type="checkbox"/> วันที่ 17 | <input type="checkbox"/> วันที่ 18 | <input checked="" type="checkbox"/> วันที่ 19 | <input checked="" type="checkbox"/> วันที่ 20 | <input type="checkbox"/> วันที่ 21 |
| <input type="checkbox"/> วันที่ 22 | <input type="checkbox"/> วันที่ 23 | <input type="checkbox"/> วันที่ 24            | <input type="checkbox"/> วันที่ 25 | <input type="checkbox"/> วันที่ 26            | <input type="checkbox"/> วันที่ 27            | <input type="checkbox"/> วันที่ 28 |
| <input type="checkbox"/> วันที่ 29 | <input type="checkbox"/> วันที่ 30 | <input checked="" type="checkbox"/> วันที่ 31 | <input type="checkbox"/> วันที่ 32 | <input checked="" type="checkbox"/> วันที่ 33 | <input checked="" type="checkbox"/> วันที่ 34 | <input type="checkbox"/> วันที่ 35 |
| <input type="checkbox"/> วันที่ 36 | <input type="checkbox"/> วันที่ 37 | <input type="checkbox"/> วันที่ 38            | <input type="checkbox"/> วันที่ 39 | <input type="checkbox"/> วันที่ 40            | <input type="checkbox"/> วันที่ 41            | <input type="checkbox"/> วันที่ 42 |
| <input type="checkbox"/> วันที่ 43 | <input type="checkbox"/> วันที่ 44 | <input checked="" type="checkbox"/> วันที่ 45 | <input type="checkbox"/> วันที่ 46 | <input checked="" type="checkbox"/> วันที่ 47 | <input checked="" type="checkbox"/> วันที่ 48 | <input type="checkbox"/> วันที่ 49 |
| <input type="checkbox"/> วันที่ 50 | <input type="checkbox"/> วันที่ 51 | <input checked="" type="checkbox"/> วันที่ 52 | <input type="checkbox"/> วันที่ 53 | <input checked="" type="checkbox"/> วันที่ 54 | <input checked="" type="checkbox"/> วันที่ 55 | <input type="checkbox"/> วันที่ 56 |
| <input type="checkbox"/> วันที่ 57 | <input type="checkbox"/> วันที่ 58 | <input checked="" type="checkbox"/> วันที่ 59 | <input type="checkbox"/> วันที่ 60 | <input type="checkbox"/> วันที่ 61            | <input checked="" type="checkbox"/> วันที่ 62 | <input type="checkbox"/> วันที่ 63 |
| <input type="checkbox"/> วันที่ 64 | <input type="checkbox"/> วันที่ 65 | <input checked="" type="checkbox"/> วันที่ 66 | <input type="checkbox"/> วันที่ 67 | <input checked="" type="checkbox"/> วันที่ 68 | <input checked="" type="checkbox"/> วันที่ 69 | <input type="checkbox"/> วันที่ 70 |
| <input type="checkbox"/> วันที่ 71 | <input type="checkbox"/> วันที่ 72 | <input type="checkbox"/> วันที่ 73            | <input type="checkbox"/> วันที่ 74 | <input type="checkbox"/> วันที่ 75            |                                               |                                    |

## ท่าที่ 13 : การฝึกการเหยียดหลังในแนวเฉียง

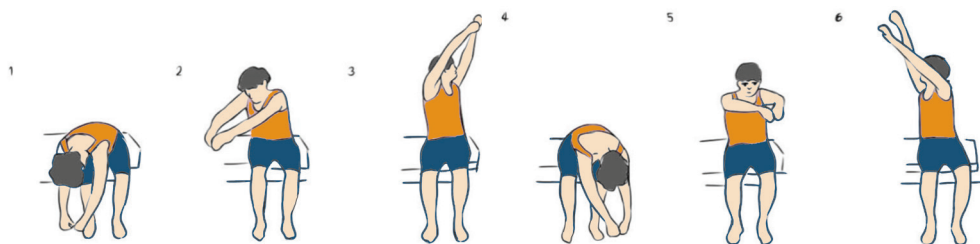

**ท่าเริ่ม:** นิ่งบนเก้าอี้หรือเตียงเท้าวางราบกับพื้นก้มหลังให้มากที่สุดเท่าที่จะทำได้และเอามือทั้งสองข้างให้แตะหรือพื้นด้านนอกของข้อเท้าขวา

**ท่าฝึก:** ทำท่าคล้าย ๆ กับท่านก้มของที่อยู่ข้างเท้าขวาด้วยสองมือ จากนั้นยกขึ้นมาเพื่อจะเอาของนั้นไปวางที่ขึ้นเหนือหัวไหล่ข้างซ้าย โดยคิดว่าชั้นนั้นอยู่สูงเท่าที่คุณจะทำได้ จากนั้นเปลี่ยนข้าง ทำท่าคล้าย ๆ กับท่านก้มของที่อยู่ข้างเท้าซ้ายด้วยสองมือ จากนั้นยกขึ้นมาเพื่อจะเอาของนั้นไปวางที่ขึ้นเหนือหัวไหล่ข้างขวา ทำข้างละ 5 ครั้ง หรือทำจนรู้สึกผ่อนคลาย

### บันทึกการฝึกออกกำลังกาย

|                                    |                                    |                                               |                                    |                                               |                                               |                                    |
|------------------------------------|------------------------------------|-----------------------------------------------|------------------------------------|-----------------------------------------------|-----------------------------------------------|------------------------------------|
| <input type="checkbox"/> วันที่ 1  | <input type="checkbox"/> วันที่ 2  | <input checked="" type="checkbox"/> วันที่ 3  | <input type="checkbox"/> วันที่ 4  | <input checked="" type="checkbox"/> วันที่ 5  | <input checked="" type="checkbox"/> วันที่ 6  | <input type="checkbox"/> วันที่ 7  |
| <input type="checkbox"/> วันที่ 8  | <input type="checkbox"/> วันที่ 9  | <input type="checkbox"/> วันที่ 10            | <input type="checkbox"/> วันที่ 11 | <input type="checkbox"/> วันที่ 12            | <input type="checkbox"/> วันที่ 13            | <input type="checkbox"/> วันที่ 14 |
| <input type="checkbox"/> วันที่ 15 | <input type="checkbox"/> วันที่ 16 | <input checked="" type="checkbox"/> วันที่ 17 | <input type="checkbox"/> วันที่ 18 | <input checked="" type="checkbox"/> วันที่ 19 | <input checked="" type="checkbox"/> วันที่ 20 | <input type="checkbox"/> วันที่ 21 |
| <input type="checkbox"/> วันที่ 22 | <input type="checkbox"/> วันที่ 23 | <input type="checkbox"/> วันที่ 24            | <input type="checkbox"/> วันที่ 25 | <input type="checkbox"/> วันที่ 26            | <input type="checkbox"/> วันที่ 27            | <input type="checkbox"/> วันที่ 28 |
| <input type="checkbox"/> วันที่ 29 | <input type="checkbox"/> วันที่ 30 | <input checked="" type="checkbox"/> วันที่ 31 | <input type="checkbox"/> วันที่ 32 | <input checked="" type="checkbox"/> วันที่ 33 | <input checked="" type="checkbox"/> วันที่ 34 | <input type="checkbox"/> วันที่ 35 |
| <input type="checkbox"/> วันที่ 36 | <input type="checkbox"/> วันที่ 37 | <input type="checkbox"/> วันที่ 38            | <input type="checkbox"/> วันที่ 39 | <input type="checkbox"/> วันที่ 40            | <input type="checkbox"/> วันที่ 41            | <input type="checkbox"/> วันที่ 42 |
| <input type="checkbox"/> วันที่ 43 | <input type="checkbox"/> วันที่ 44 | <input checked="" type="checkbox"/> วันที่ 45 | <input type="checkbox"/> วันที่ 46 | <input checked="" type="checkbox"/> วันที่ 47 | <input checked="" type="checkbox"/> วันที่ 48 | <input type="checkbox"/> วันที่ 49 |
| <input type="checkbox"/> วันที่ 50 | <input type="checkbox"/> วันที่ 51 | <input checked="" type="checkbox"/> วันที่ 52 | <input type="checkbox"/> วันที่ 53 | <input checked="" type="checkbox"/> วันที่ 54 | <input checked="" type="checkbox"/> วันที่ 55 | <input type="checkbox"/> วันที่ 56 |
| <input type="checkbox"/> วันที่ 57 | <input type="checkbox"/> วันที่ 58 | <input checked="" type="checkbox"/> วันที่ 59 | <input type="checkbox"/> วันที่ 60 | <input type="checkbox"/> วันที่ 61            | <input checked="" type="checkbox"/> วันที่ 62 | <input type="checkbox"/> วันที่ 63 |
| <input type="checkbox"/> วันที่ 64 | <input type="checkbox"/> วันที่ 65 | <input checked="" type="checkbox"/> วันที่ 66 | <input type="checkbox"/> วันที่ 67 | <input checked="" type="checkbox"/> วันที่ 68 | <input checked="" type="checkbox"/> วันที่ 69 | <input type="checkbox"/> วันที่ 70 |
| <input type="checkbox"/> วันที่ 71 | <input type="checkbox"/> วันที่ 72 | <input type="checkbox"/> วันที่ 73            | <input type="checkbox"/> วันที่ 74 | <input type="checkbox"/> วันที่ 75            |                                               |                                    |

## ท่าที่ 14 : การฝึกเอียงลำตัวในท่ายืน

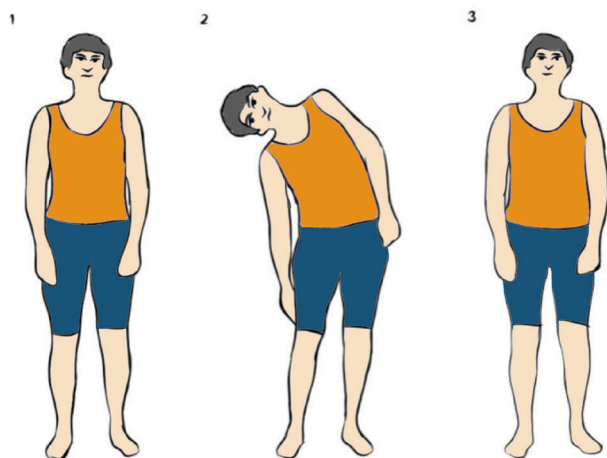

**ท่าเริ่ม:** ท่านยืนตัวตรง หลังตรง หน้าตรง เท้าสองข้างห่างกัน 1 ช่วงไหล่ สามารถจับเก้าอี้เพื่อความปลอดภัย

**ท่าฝึก:** ท่านค่อย ๆ เอียงศีรษะไปทางด้านขวา โดยเอาหูชิดไหล่ และค่อย ๆ เอียงลำตัวไปทางด้านขวา ปลดปล่อยตามสบาย จากนั้นกลับสู่ท่ายืนตัวตรง และค่อย ๆ เอียงศีรษะไปทางด้านซ้าย โดยเอาหูชิดไหล่ และค่อย ๆ เอียงลำตัวไปทางด้านซ้าย ปลดปล่อยตามสบาย (ท่านสามารถเอียงตามจังหวะเมโทรโนมตามที่มีนักกายภาพบำบัดแนะนำได้) ทำจนรู้สึกผ่อนคลาย

### บันทึกการฝึกออกกำลังกาย

|                                    |                                    |                                               |                                    |                                               |                                               |                                    |
|------------------------------------|------------------------------------|-----------------------------------------------|------------------------------------|-----------------------------------------------|-----------------------------------------------|------------------------------------|
| <input type="checkbox"/> วันที่ 1  | <input type="checkbox"/> วันที่ 2  | <input checked="" type="checkbox"/> วันที่ 3  | <input type="checkbox"/> วันที่ 4  | <input checked="" type="checkbox"/> วันที่ 5  | <input checked="" type="checkbox"/> วันที่ 6  | <input type="checkbox"/> วันที่ 7  |
| <input type="checkbox"/> วันที่ 8  | <input type="checkbox"/> วันที่ 9  | <input type="checkbox"/> วันที่ 10            | <input type="checkbox"/> วันที่ 11 | <input type="checkbox"/> วันที่ 12            | <input type="checkbox"/> วันที่ 13            | <input type="checkbox"/> วันที่ 14 |
| <input type="checkbox"/> วันที่ 15 | <input type="checkbox"/> วันที่ 16 | <input checked="" type="checkbox"/> วันที่ 17 | <input type="checkbox"/> วันที่ 18 | <input checked="" type="checkbox"/> วันที่ 19 | <input checked="" type="checkbox"/> วันที่ 20 | <input type="checkbox"/> วันที่ 21 |
| <input type="checkbox"/> วันที่ 22 | <input type="checkbox"/> วันที่ 23 | <input type="checkbox"/> วันที่ 24            | <input type="checkbox"/> วันที่ 25 | <input type="checkbox"/> วันที่ 26            | <input type="checkbox"/> วันที่ 27            | <input type="checkbox"/> วันที่ 28 |
| <input type="checkbox"/> วันที่ 29 | <input type="checkbox"/> วันที่ 30 | <input checked="" type="checkbox"/> วันที่ 31 | <input type="checkbox"/> วันที่ 32 | <input checked="" type="checkbox"/> วันที่ 33 | <input checked="" type="checkbox"/> วันที่ 34 | <input type="checkbox"/> วันที่ 35 |
| <input type="checkbox"/> วันที่ 36 | <input type="checkbox"/> วันที่ 37 | <input type="checkbox"/> วันที่ 38            | <input type="checkbox"/> วันที่ 39 | <input type="checkbox"/> วันที่ 40            | <input type="checkbox"/> วันที่ 41            | <input type="checkbox"/> วันที่ 42 |
| <input type="checkbox"/> วันที่ 43 | <input type="checkbox"/> วันที่ 44 | <input checked="" type="checkbox"/> วันที่ 45 | <input type="checkbox"/> วันที่ 46 | <input checked="" type="checkbox"/> วันที่ 47 | <input checked="" type="checkbox"/> วันที่ 48 | <input type="checkbox"/> วันที่ 49 |
| <input type="checkbox"/> วันที่ 50 | <input type="checkbox"/> วันที่ 51 | <input checked="" type="checkbox"/> วันที่ 52 | <input type="checkbox"/> วันที่ 53 | <input checked="" type="checkbox"/> วันที่ 54 | <input checked="" type="checkbox"/> วันที่ 55 | <input type="checkbox"/> วันที่ 56 |
| <input type="checkbox"/> วันที่ 57 | <input type="checkbox"/> วันที่ 58 | <input checked="" type="checkbox"/> วันที่ 59 | <input type="checkbox"/> วันที่ 60 | <input type="checkbox"/> วันที่ 61            | <input checked="" type="checkbox"/> วันที่ 62 | <input type="checkbox"/> วันที่ 63 |
| <input type="checkbox"/> วันที่ 64 | <input type="checkbox"/> วันที่ 65 | <input checked="" type="checkbox"/> วันที่ 66 | <input type="checkbox"/> วันที่ 67 | <input checked="" type="checkbox"/> วันที่ 68 | <input checked="" type="checkbox"/> วันที่ 69 | <input type="checkbox"/> วันที่ 70 |
| <input type="checkbox"/> วันที่ 71 | <input type="checkbox"/> วันที่ 72 | <input type="checkbox"/> วันที่ 73            | <input type="checkbox"/> วันที่ 74 | <input type="checkbox"/> วันที่ 75            |                                               |                                    |

## ท่าที่ 15 : การฝึกบิดหมุนลำตัว

1

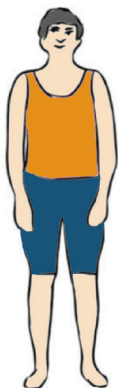

2

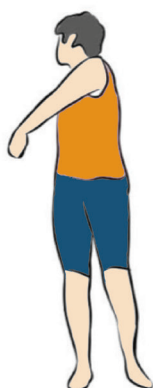

3

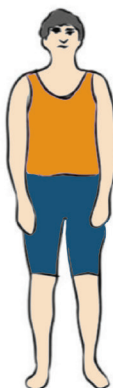

4

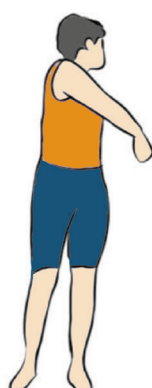

**ท่าเริ่ม:** ท่านยืนตัวตรง หลังตรง หน้าตรง เท้าสองข้างห่างกัน 1 ช่วงไหล่ สามารถจับเก้าอี้เพื่อความปลอดภัย

**ท่าฝึก:** หมุนลำตัวไปทางขวา โดยแกว่งแขนทั้งสองข้างไปด้วย ต้องรู้สึกว่ามีน้ำหนักถ่ายไปยังเท้าข้างซ้าย จากนั้นหมุนตัวกลับมาตรงกลาง และค่อย ๆ เปลี่ยนเป็นหมุนลำตัวไปทางซ้าย โดยแกว่งแขนทั้งสองข้างไปด้วย ต้องรู้สึกว่ามีน้ำหนักถ่ายไปยังเท้าข้างขวาเช่นเดียวกัน (ท่านสามารถหมุนตามจังหวะเมโทรโนมตามที่นักกายภาพบำบัดแนะนำได้) ทำจนรู้สึกผ่อนคลาย

### บันทึกการฝึกออกกำลังกาย

|                                    |                                    |                                               |                                    |                                               |                                               |                                    |
|------------------------------------|------------------------------------|-----------------------------------------------|------------------------------------|-----------------------------------------------|-----------------------------------------------|------------------------------------|
| <input type="checkbox"/> วันที่ 1  | <input type="checkbox"/> วันที่ 2  | <input checked="" type="checkbox"/> วันที่ 3  | <input type="checkbox"/> วันที่ 4  | <input checked="" type="checkbox"/> วันที่ 5  | <input checked="" type="checkbox"/> วันที่ 6  | <input type="checkbox"/> วันที่ 7  |
| <input type="checkbox"/> วันที่ 8  | <input type="checkbox"/> วันที่ 9  | <input type="checkbox"/> วันที่ 10            | <input type="checkbox"/> วันที่ 11 | <input type="checkbox"/> วันที่ 12            | <input type="checkbox"/> วันที่ 13            | <input type="checkbox"/> วันที่ 14 |
| <input type="checkbox"/> วันที่ 15 | <input type="checkbox"/> วันที่ 16 | <input checked="" type="checkbox"/> วันที่ 17 | <input type="checkbox"/> วันที่ 18 | <input checked="" type="checkbox"/> วันที่ 19 | <input checked="" type="checkbox"/> วันที่ 20 | <input type="checkbox"/> วันที่ 21 |
| <input type="checkbox"/> วันที่ 22 | <input type="checkbox"/> วันที่ 23 | <input type="checkbox"/> วันที่ 24            | <input type="checkbox"/> วันที่ 25 | <input type="checkbox"/> วันที่ 26            | <input type="checkbox"/> วันที่ 27            | <input type="checkbox"/> วันที่ 28 |
| <input type="checkbox"/> วันที่ 29 | <input type="checkbox"/> วันที่ 30 | <input checked="" type="checkbox"/> วันที่ 31 | <input type="checkbox"/> วันที่ 32 | <input checked="" type="checkbox"/> วันที่ 33 | <input checked="" type="checkbox"/> วันที่ 34 | <input type="checkbox"/> วันที่ 35 |
| <input type="checkbox"/> วันที่ 36 | <input type="checkbox"/> วันที่ 37 | <input type="checkbox"/> วันที่ 38            | <input type="checkbox"/> วันที่ 39 | <input type="checkbox"/> วันที่ 40            | <input type="checkbox"/> วันที่ 41            | <input type="checkbox"/> วันที่ 42 |
| <input type="checkbox"/> วันที่ 43 | <input type="checkbox"/> วันที่ 44 | <input checked="" type="checkbox"/> วันที่ 45 | <input type="checkbox"/> วันที่ 46 | <input checked="" type="checkbox"/> วันที่ 47 | <input checked="" type="checkbox"/> วันที่ 48 | <input type="checkbox"/> วันที่ 49 |
| <input type="checkbox"/> วันที่ 50 | <input type="checkbox"/> วันที่ 51 | <input checked="" type="checkbox"/> วันที่ 52 | <input type="checkbox"/> วันที่ 53 | <input checked="" type="checkbox"/> วันที่ 54 | <input checked="" type="checkbox"/> วันที่ 55 | <input type="checkbox"/> วันที่ 56 |
| <input type="checkbox"/> วันที่ 57 | <input type="checkbox"/> วันที่ 58 | <input checked="" type="checkbox"/> วันที่ 59 | <input type="checkbox"/> วันที่ 60 | <input type="checkbox"/> วันที่ 61            | <input checked="" type="checkbox"/> วันที่ 62 | <input type="checkbox"/> วันที่ 63 |
| <input type="checkbox"/> วันที่ 64 | <input type="checkbox"/> วันที่ 65 | <input checked="" type="checkbox"/> วันที่ 66 | <input type="checkbox"/> วันที่ 67 | <input checked="" type="checkbox"/> วันที่ 68 | <input checked="" type="checkbox"/> วันที่ 69 | <input type="checkbox"/> วันที่ 70 |
| <input type="checkbox"/> วันที่ 71 | <input type="checkbox"/> วันที่ 72 | <input type="checkbox"/> วันที่ 73            | <input type="checkbox"/> วันที่ 74 | <input type="checkbox"/> วันที่ 75            |                                               |                                    |

## ท่าที่ 16 : การฝึกบิดหมุนลำตัวส่วนล่าง

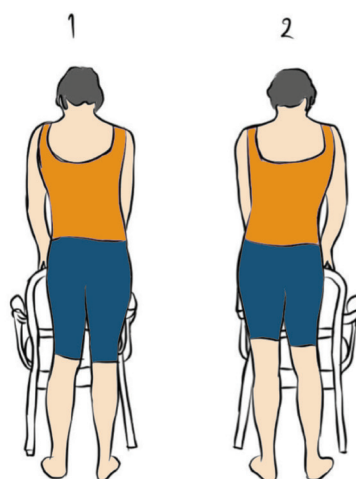

**ท่าเริ่ม:** ท่านยืนตัวตรง หลังตรง หน้าตรง เท้าสองข้างห่างกัน 1 ช่วงไหล่ สามารถจับเก้าอี้เพื่อความปลอดภัย

**ท่าฝึก:** หมุนสะโพกขวาไปทางซ้าย โดยลำตัวตรง ท่านต้องรู้สึกว่าการถ่ายน้ำหนักจากข้างขวาไปทางซ้ายจากนั้นเปลี่ยนหมุนสะโพกซ้ายไปทางขวาโดยลำตัวตรงท่านต้องรู้สึกว่าการถ่ายน้ำหนักจากข้างซ้ายไปทางขวา (ท่านสามารถหมุนตามจังหวะเมโทรโนมตามที่นักกายภาพบำบัดแนะนำได้) ทำจนรู้สึกผ่อนคลาย

### บันทึกการฝึกออกกำลังกาย

|                                               |                                    |                                               |                                    |                                               |                                               |                                    |
|-----------------------------------------------|------------------------------------|-----------------------------------------------|------------------------------------|-----------------------------------------------|-----------------------------------------------|------------------------------------|
| <input type="checkbox"/> วันที่ 1             | <input type="checkbox"/> วันที่ 2  | <input checked="" type="checkbox"/> วันที่ 3  | <input type="checkbox"/> วันที่ 4  | <input checked="" type="checkbox"/> วันที่ 5  | <input checked="" type="checkbox"/> วันที่ 6  | <input type="checkbox"/> วันที่ 7  |
| <input type="checkbox"/> วันที่ 8             | <input type="checkbox"/> วันที่ 9  | <input type="checkbox"/> วันที่ 10            | <input type="checkbox"/> วันที่ 11 | <input type="checkbox"/> วันที่ 12            | <input type="checkbox"/> วันที่ 13            | <input type="checkbox"/> วันที่ 14 |
| <input type="checkbox"/> วันที่ 15            | <input type="checkbox"/> วันที่ 16 | <input checked="" type="checkbox"/> วันที่ 17 | <input type="checkbox"/> วันที่ 18 | <input checked="" type="checkbox"/> วันที่ 19 | <input checked="" type="checkbox"/> วันที่ 20 | <input type="checkbox"/> วันที่ 21 |
| <input type="checkbox"/> วันที่ 22            | <input type="checkbox"/> วันที่ 23 | <input checked="" type="checkbox"/> วันที่ 24 | <input type="checkbox"/> วันที่ 25 | <input type="checkbox"/> วันที่ 26            | <input type="checkbox"/> วันที่ 27            | <input type="checkbox"/> วันที่ 28 |
| <input checked="" type="checkbox"/> วันที่ 29 | <input type="checkbox"/> วันที่ 30 | <input checked="" type="checkbox"/> วันที่ 31 | <input type="checkbox"/> วันที่ 32 | <input checked="" type="checkbox"/> วันที่ 33 | <input checked="" type="checkbox"/> วันที่ 34 | <input type="checkbox"/> วันที่ 35 |
| <input type="checkbox"/> วันที่ 36            | <input type="checkbox"/> วันที่ 37 | <input type="checkbox"/> วันที่ 38            | <input type="checkbox"/> วันที่ 39 | <input type="checkbox"/> วันที่ 40            | <input type="checkbox"/> วันที่ 41            | <input type="checkbox"/> วันที่ 42 |
| <input type="checkbox"/> วันที่ 43            | <input type="checkbox"/> วันที่ 44 | <input checked="" type="checkbox"/> วันที่ 45 | <input type="checkbox"/> วันที่ 46 | <input checked="" type="checkbox"/> วันที่ 47 | <input checked="" type="checkbox"/> วันที่ 48 | <input type="checkbox"/> วันที่ 49 |
| <input type="checkbox"/> วันที่ 50            | <input type="checkbox"/> วันที่ 51 | <input checked="" type="checkbox"/> วันที่ 52 | <input type="checkbox"/> วันที่ 53 | <input checked="" type="checkbox"/> วันที่ 54 | <input checked="" type="checkbox"/> วันที่ 55 | <input type="checkbox"/> วันที่ 56 |
| <input type="checkbox"/> วันที่ 57            | <input type="checkbox"/> วันที่ 58 | <input checked="" type="checkbox"/> วันที่ 59 | <input type="checkbox"/> วันที่ 60 | <input type="checkbox"/> วันที่ 61            | <input checked="" type="checkbox"/> วันที่ 62 | <input type="checkbox"/> วันที่ 63 |
| <input type="checkbox"/> วันที่ 64            | <input type="checkbox"/> วันที่ 65 | <input checked="" type="checkbox"/> วันที่ 66 | <input type="checkbox"/> วันที่ 67 | <input checked="" type="checkbox"/> วันที่ 68 | <input checked="" type="checkbox"/> วันที่ 69 | <input type="checkbox"/> วันที่ 70 |
| <input type="checkbox"/> วันที่ 71            | <input type="checkbox"/> วันที่ 72 | <input type="checkbox"/> วันที่ 73            | <input type="checkbox"/> วันที่ 74 | <input type="checkbox"/> วันที่ 75            |                                               |                                    |

## ท่าที่ 17 : การฝึกยืนและโยก

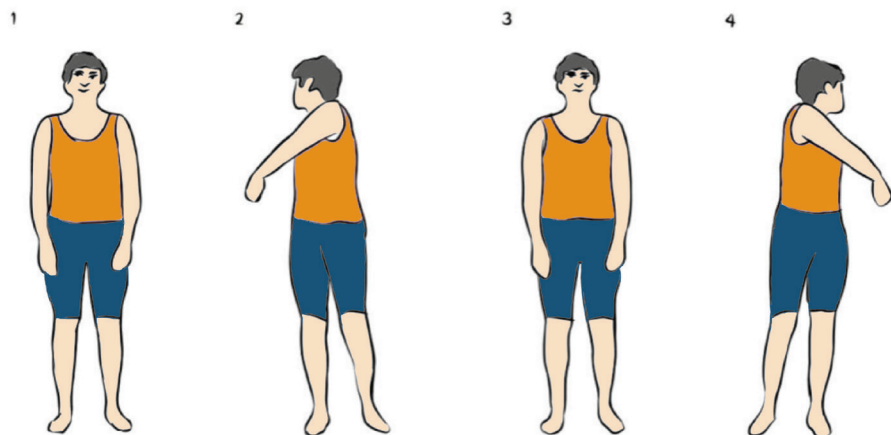

**ท่าเริ่ม:** ท่านยืนตัวตรง หลังตรง หน้าตรง เท้าวางอยู่หน้าต่อเท้าซ้าย 1 ช่วงก้าว

**ท่าฝึก:** ท่านถ่าน้ำหนักไปทางด้านหน้า โดยเคลื่อนสะโพกไปยังเท้าขวา ค่อย ๆ เคลื่อนจนกว่าเท้าซ้ายจะเปิด จากนั้นค่อย ๆ ถ่าน้ำหนักกลับมาทางด้านหลัง โดยเคลื่อนสะโพกไปยังเท้าซ้าย เคลื่อนมาด้านหลังจนเท้าวางจากพื้นเล็กน้อยทำหลายๆครั้ง จากนั้นเปลี่ยนเป็นเท้าซ้ายอยู่ข้างหน้าและทำซ้ำ (ท่านสามารถทำตามจังหวะเมโทรโนมตามักกายภาพบำบัดแนะนำได้) ท่านรู้สึกผ่อนคลาย

### บันทึกการฝึกออกกำลังกาย

|                                    |                                    |                                               |                                    |                                               |                                               |                                    |
|------------------------------------|------------------------------------|-----------------------------------------------|------------------------------------|-----------------------------------------------|-----------------------------------------------|------------------------------------|
| <input type="checkbox"/> วันที่ 1  | <input type="checkbox"/> วันที่ 2  | <input checked="" type="checkbox"/> วันที่ 3  | <input type="checkbox"/> วันที่ 4  | <input checked="" type="checkbox"/> วันที่ 5  | <input checked="" type="checkbox"/> วันที่ 6  | <input type="checkbox"/> วันที่ 7  |
| <input type="checkbox"/> วันที่ 8  | <input type="checkbox"/> วันที่ 9  | <input type="checkbox"/> วันที่ 10            | <input type="checkbox"/> วันที่ 11 | <input type="checkbox"/> วันที่ 12            | <input type="checkbox"/> วันที่ 13            | <input type="checkbox"/> วันที่ 14 |
| <input type="checkbox"/> วันที่ 15 | <input type="checkbox"/> วันที่ 16 | <input checked="" type="checkbox"/> วันที่ 17 | <input type="checkbox"/> วันที่ 18 | <input checked="" type="checkbox"/> วันที่ 19 | <input checked="" type="checkbox"/> วันที่ 20 | <input type="checkbox"/> วันที่ 21 |
| <input type="checkbox"/> วันที่ 22 | <input type="checkbox"/> วันที่ 23 | <input type="checkbox"/> วันที่ 24            | <input type="checkbox"/> วันที่ 25 | <input type="checkbox"/> วันที่ 26            | <input type="checkbox"/> วันที่ 27            | <input type="checkbox"/> วันที่ 28 |
| <input type="checkbox"/> วันที่ 29 | <input type="checkbox"/> วันที่ 30 | <input checked="" type="checkbox"/> วันที่ 31 | <input type="checkbox"/> วันที่ 32 | <input checked="" type="checkbox"/> วันที่ 33 | <input checked="" type="checkbox"/> วันที่ 34 | <input type="checkbox"/> วันที่ 35 |
| <input type="checkbox"/> วันที่ 36 | <input type="checkbox"/> วันที่ 37 | <input type="checkbox"/> วันที่ 38            | <input type="checkbox"/> วันที่ 39 | <input type="checkbox"/> วันที่ 40            | <input type="checkbox"/> วันที่ 41            | <input type="checkbox"/> วันที่ 42 |
| <input type="checkbox"/> วันที่ 43 | <input type="checkbox"/> วันที่ 44 | <input checked="" type="checkbox"/> วันที่ 45 | <input type="checkbox"/> วันที่ 46 | <input checked="" type="checkbox"/> วันที่ 47 | <input checked="" type="checkbox"/> วันที่ 48 | <input type="checkbox"/> วันที่ 49 |
| <input type="checkbox"/> วันที่ 50 | <input type="checkbox"/> วันที่ 51 | <input checked="" type="checkbox"/> วันที่ 52 | <input type="checkbox"/> วันที่ 53 | <input checked="" type="checkbox"/> วันที่ 54 | <input checked="" type="checkbox"/> วันที่ 55 | <input type="checkbox"/> วันที่ 56 |
| <input type="checkbox"/> วันที่ 57 | <input type="checkbox"/> วันที่ 58 | <input checked="" type="checkbox"/> วันที่ 59 | <input type="checkbox"/> วันที่ 60 | <input type="checkbox"/> วันที่ 61            | <input checked="" type="checkbox"/> วันที่ 62 | <input type="checkbox"/> วันที่ 63 |
| <input type="checkbox"/> วันที่ 64 | <input type="checkbox"/> วันที่ 65 | <input checked="" type="checkbox"/> วันที่ 66 | <input type="checkbox"/> วันที่ 67 | <input checked="" type="checkbox"/> วันที่ 68 | <input checked="" type="checkbox"/> วันที่ 69 | <input type="checkbox"/> วันที่ 70 |
| <input type="checkbox"/> วันที่ 71 | <input type="checkbox"/> วันที่ 72 | <input type="checkbox"/> วันที่ 73            | <input type="checkbox"/> วันที่ 74 | <input type="checkbox"/> วันที่ 75            |                                               |                                    |

## ท่าที่ 18 : การสร้างสรรค์การเคลื่อนไหว

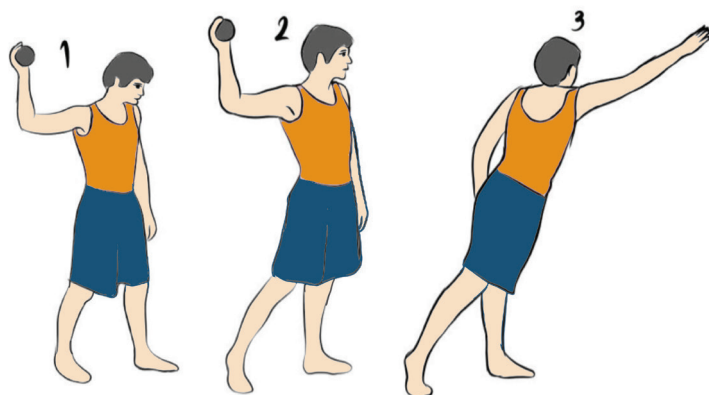

**ท่าเริ่ม:** ท่านยืนตัวตรง หลังตรง หน้าตรง เท้าวางอยู่หน้าตักเท้าซ้าย 1 ช่วงก้าว

**ท่าฝึก:** ท่านสามารถฝึกท่าทางคล้าย ๆ กับท่านกำลังกว้างลูกบอลไปข้างหน้า โดยฝึกถ่ายน้ำหนักจากเท้าหนึ่งไปยังอีกเท้าหนึ่ง และมีการบิดหมุนร่างกาย

### บันทึกการฝึกออกกำลังกาย

|                                    |                                    |                                               |                                    |                                               |                                               |                                    |
|------------------------------------|------------------------------------|-----------------------------------------------|------------------------------------|-----------------------------------------------|-----------------------------------------------|------------------------------------|
| <input type="checkbox"/> วันที่ 1  | <input type="checkbox"/> วันที่ 2  | <input checked="" type="checkbox"/> วันที่ 3  | <input type="checkbox"/> วันที่ 4  | <input checked="" type="checkbox"/> วันที่ 5  | <input checked="" type="checkbox"/> วันที่ 6  | <input type="checkbox"/> วันที่ 7  |
| <input type="checkbox"/> วันที่ 8  | <input type="checkbox"/> วันที่ 9  | <input type="checkbox"/> วันที่ 10            | <input type="checkbox"/> วันที่ 11 | <input type="checkbox"/> วันที่ 12            | <input type="checkbox"/> วันที่ 13            | <input type="checkbox"/> วันที่ 14 |
| <input type="checkbox"/> วันที่ 15 | <input type="checkbox"/> วันที่ 16 | <input checked="" type="checkbox"/> วันที่ 17 | <input type="checkbox"/> วันที่ 18 | <input checked="" type="checkbox"/> วันที่ 19 | <input checked="" type="checkbox"/> วันที่ 20 | <input type="checkbox"/> วันที่ 21 |
| <input type="checkbox"/> วันที่ 22 | <input type="checkbox"/> วันที่ 23 | <input type="checkbox"/> วันที่ 24            | <input type="checkbox"/> วันที่ 25 | <input type="checkbox"/> วันที่ 26            | <input type="checkbox"/> วันที่ 27            | <input type="checkbox"/> วันที่ 28 |
| <input type="checkbox"/> วันที่ 29 | <input type="checkbox"/> วันที่ 30 | <input checked="" type="checkbox"/> วันที่ 31 | <input type="checkbox"/> วันที่ 32 | <input checked="" type="checkbox"/> วันที่ 33 | <input checked="" type="checkbox"/> วันที่ 34 | <input type="checkbox"/> วันที่ 35 |
| <input type="checkbox"/> วันที่ 36 | <input type="checkbox"/> วันที่ 37 | <input type="checkbox"/> วันที่ 38            | <input type="checkbox"/> วันที่ 39 | <input type="checkbox"/> วันที่ 40            | <input type="checkbox"/> วันที่ 41            | <input type="checkbox"/> วันที่ 42 |
| <input type="checkbox"/> วันที่ 43 | <input type="checkbox"/> วันที่ 44 | <input checked="" type="checkbox"/> วันที่ 45 | <input type="checkbox"/> วันที่ 46 | <input checked="" type="checkbox"/> วันที่ 47 | <input checked="" type="checkbox"/> วันที่ 48 | <input type="checkbox"/> วันที่ 49 |
| <input type="checkbox"/> วันที่ 50 | <input type="checkbox"/> วันที่ 51 | <input checked="" type="checkbox"/> วันที่ 52 | <input type="checkbox"/> วันที่ 53 | <input checked="" type="checkbox"/> วันที่ 54 | <input checked="" type="checkbox"/> วันที่ 55 | <input type="checkbox"/> วันที่ 56 |
| <input type="checkbox"/> วันที่ 57 | <input type="checkbox"/> วันที่ 58 | <input checked="" type="checkbox"/> วันที่ 59 | <input type="checkbox"/> วันที่ 60 | <input type="checkbox"/> วันที่ 61            | <input checked="" type="checkbox"/> วันที่ 62 | <input type="checkbox"/> วันที่ 63 |
| <input type="checkbox"/> วันที่ 64 | <input type="checkbox"/> วันที่ 65 | <input checked="" type="checkbox"/> วันที่ 66 | <input type="checkbox"/> วันที่ 67 | <input checked="" type="checkbox"/> วันที่ 68 | <input checked="" type="checkbox"/> วันที่ 69 | <input type="checkbox"/> วันที่ 70 |
| <input type="checkbox"/> วันที่ 71 | <input type="checkbox"/> วันที่ 72 | <input type="checkbox"/> วันที่ 73            | <input type="checkbox"/> วันที่ 74 | <input type="checkbox"/> วันที่ 75            |                                               |                                    |



## ท่าที่ 19 : การฝึกเดิน

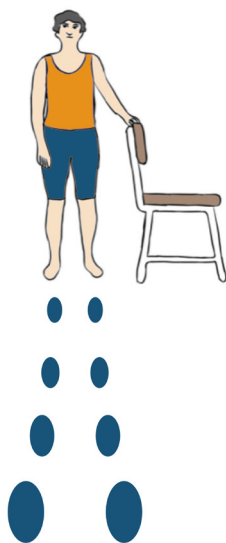

รูปแบบทางเดินของการฝึกเดินเป็นทางตรงระยะ 10 เมตร และมีเครื่องหมายหรือสัญลักษณ์เพื่อฝึกก้าวเดินของท่าน โดยระยะก้าวกำหนดให้ยาวกว่าระยะก้าวปกติของท่านประมาณ 2-5 เซนติเมตร เดินจำนวน 5 รอบ

### บันทึกการฝึกออกกำลังกาย

|                                    |                                    |                                               |                                    |                                               |                                               |                                    |
|------------------------------------|------------------------------------|-----------------------------------------------|------------------------------------|-----------------------------------------------|-----------------------------------------------|------------------------------------|
| <input type="checkbox"/> วันที่ 1  | <input type="checkbox"/> วันที่ 2  | <input type="checkbox"/> วันที่ 3             | <input type="checkbox"/> วันที่ 4  | <input checked="" type="checkbox"/> วันที่ 5  | <input type="checkbox"/> วันที่ 6             | <input type="checkbox"/> วันที่ 7  |
| <input type="checkbox"/> วันที่ 8  | <input type="checkbox"/> วันที่ 9  | <input type="checkbox"/> วันที่ 10            | <input type="checkbox"/> วันที่ 11 | <input type="checkbox"/> วันที่ 12            | <input type="checkbox"/> วันที่ 13            | <input type="checkbox"/> วันที่ 14 |
| <input type="checkbox"/> วันที่ 15 | <input type="checkbox"/> วันที่ 16 | <input checked="" type="checkbox"/> วันที่ 17 | <input type="checkbox"/> วันที่ 18 | <input checked="" type="checkbox"/> วันที่ 19 | <input checked="" type="checkbox"/> วันที่ 20 | <input type="checkbox"/> วันที่ 21 |
| <input type="checkbox"/> วันที่ 22 | <input type="checkbox"/> วันที่ 23 | <input type="checkbox"/> วันที่ 24            | <input type="checkbox"/> วันที่ 25 | <input type="checkbox"/> วันที่ 26            | <input type="checkbox"/> วันที่ 27            | <input type="checkbox"/> วันที่ 28 |
| <input type="checkbox"/> วันที่ 29 | <input type="checkbox"/> วันที่ 30 | <input checked="" type="checkbox"/> วันที่ 31 | <input type="checkbox"/> วันที่ 32 | <input checked="" type="checkbox"/> วันที่ 33 | <input checked="" type="checkbox"/> วันที่ 34 | <input type="checkbox"/> วันที่ 35 |
| <input type="checkbox"/> วันที่ 36 | <input type="checkbox"/> วันที่ 37 | <input type="checkbox"/> วันที่ 38            | <input type="checkbox"/> วันที่ 39 | <input type="checkbox"/> วันที่ 40            | <input type="checkbox"/> วันที่ 41            | <input type="checkbox"/> วันที่ 42 |
| <input type="checkbox"/> วันที่ 43 | <input type="checkbox"/> วันที่ 44 | <input checked="" type="checkbox"/> วันที่ 45 | <input type="checkbox"/> วันที่ 46 | <input checked="" type="checkbox"/> วันที่ 47 | <input checked="" type="checkbox"/> วันที่ 48 | <input type="checkbox"/> วันที่ 49 |
| <input type="checkbox"/> วันที่ 50 | <input type="checkbox"/> วันที่ 51 | <input type="checkbox"/> วันที่ 52            | <input type="checkbox"/> วันที่ 53 | <input type="checkbox"/> วันที่ 54            | <input type="checkbox"/> วันที่ 55            | <input type="checkbox"/> วันที่ 56 |
| <input type="checkbox"/> วันที่ 57 | <input type="checkbox"/> วันที่ 58 | <input checked="" type="checkbox"/> วันที่ 59 | <input type="checkbox"/> วันที่ 60 | <input type="checkbox"/> วันที่ 61            | <input checked="" type="checkbox"/> วันที่ 62 | <input type="checkbox"/> วันที่ 63 |
| <input type="checkbox"/> วันที่ 64 | <input type="checkbox"/> วันที่ 65 | <input checked="" type="checkbox"/> วันที่ 66 | <input type="checkbox"/> วันที่ 67 | <input checked="" type="checkbox"/> วันที่ 68 | <input checked="" type="checkbox"/> วันที่ 69 | <input type="checkbox"/> วันที่ 70 |
| <input type="checkbox"/> วันที่ 71 | <input type="checkbox"/> วันที่ 72 | <input type="checkbox"/> วันที่ 73            | <input type="checkbox"/> วันที่ 74 | <input type="checkbox"/> วันที่ 75            |                                               |                                    |

เสร็จสิ้นโปรแกรม

# Thank You

หลังจากยืดกล้ามเนื้อแล้ว ท่านเข้าสู่การออกกำลังกาย โดยให้ท่านทำงานรู้สึกผ่อนคลายทุกท่า และหากท่านได้ทำแล้ว ให้ท่านทำเครื่องหมายถูกในตารางทุกวัน หากท่านรู้สึกเหนื่อยหรือรู้สึกผิดปกติใดๆให้ท่านหยุดพักจนกว่าจะดีขึ้น

จากผู้เขียน

ท่าออกกำลังกายทั้งหมดได้ประยุกต์มาจาก

Professor Margaret Schenkman, PhD,

Physical Medicine & Rehabilitation, University of Colorado

ต้องขอกราบขอบพระคุณมา ณ ที่นี้ด้วย



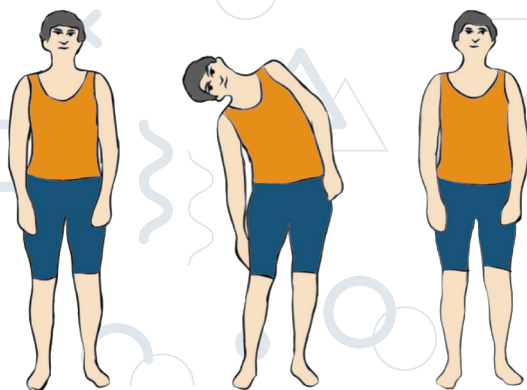

## สมุดบันทึกการออกกำลังกายที่บ้าน

เพื่อพัฒนาการเดินและการหมุนตัวในผู้ป่วยโรคพาร์กินสัน

โดย อาจารย์พิจิสา ทองกุล
